# Supplementary material for: Reactive oxygen species-responsive Pre-PROTAC for tumor-specific protein degradation
Source: Royal Society of Chemistry journal article supplement (doi:10.1039/d2cc03367d), 2022-01-01

## Supplementary information

# Reactive oxygen species-responsive Pre-PROTAC for tumor-specific protein degradation

Haixia Liu,<sup>†a,b</sup> Chaowei Ren,<sup>†a,c</sup> Renhong Sun,<sup>a,d</sup> Huihui Wang,<sup>a,c</sup> Yuexiong Zhan,<sup>a</sup> Xiaobao Yang,<sup>\*a,d</sup> Biao Jiang,<sup>\*a,b,c,e</sup> Hongli Chen<sup>\*a</sup>

<sup>a</sup> Shanghai Institute for Advanced Immunochemical Studies, ShanghaiTech University, 393 Middle Huaxia Road, Pudong, Shanghai, 201210, China.

E-mail: chenhl@shanghaitech.edu.cn; jiang-biao@shanghaitech.edu.cn

<sup>b</sup> School of Physical Science and Technology, ShanghaiTech University, 393 Middle Huaxia Road, Pudong, Shanghai, 201210, China.

<sup>c</sup> School of Life Science and Technology, ShanghaiTech University, 393 Middle Huaxia Road, Pudong, Shanghai, 201210, China.

<sup>d</sup> Gluetacs Therapeutics (Shanghai) Co., Ltd., 99 Haike Road, Zhangjiang Hi-Tech Park, Shanghai, 201210, China.

E-mail: yang.xiaobao@gluetacs.com

<sup>e</sup> CAS Key Laboratory of Synthetic Chemistry of Natural Substances, Shanghai Institute of Organic Chemistry, Chinese Academy of Sciences, 345 Lingling Road, Shanghai 200032, China

†Equal contribution

## Table of Contents

|                                                                                         |    |
|-----------------------------------------------------------------------------------------|----|
| Material and methods: Chemistry .....                                                   | 2  |
| Material and instruments .....                                                          | 2  |
| H <sub>2</sub> O <sub>2</sub> responsive of pre-PROTACs .....                           | 2  |
| Pre-PROTAC <b>7</b> with different concentration of H <sub>2</sub> O <sub>2</sub> ..... | 2  |
| The stability of pre-PROTAC <b>7</b> .....                                              | 2  |
| Synthesis route and produre of pre-PROTACs .....                                        | 3  |
| Material and methods: Biology .....                                                     | 9  |
| Cell culture .....                                                                      | 9  |
| ROS detection .....                                                                     | 9  |
| Western blotting .....                                                                  | 9  |
| Cell growth inhibition .....                                                            | 9  |
| Degradation signaling study .....                                                       | 10 |
| Supplementary Figures .....                                                             | 10 |
| Raw western botting data .....                                                          | 25 |

## Material and methods: Chemistry

### Material and instruments

All chemicals were obtained from commercial suppliers (Adamas and Alfa, bidepharm, ChemShuttl), and used without further purification. Flash chromatography was carried out on silica gel (200-300 mesh). All new compounds were characterized by  $^1\text{H}$  NMR,  $^{13}\text{C}$  NMR, HRMS.  $^1\text{H}$  and  $^{13}\text{C}$  NMR spectra were recorded on Bruker AVANCE III 500 MHz (operating at 500 MHz for  $^1\text{H}$  and  $^{13}\text{C}$  NMR), chemical shifts were reported in ppm relative to the residual *d*6-DMSO (2.50 ppm  $^1\text{H}$ ), MeOD (3.31 ppm  $^1\text{H}$ ) and coupling constants (J) are given in Hz. Multiplicities of signals are described as follows: s = singlet, d = doublet, t = triplet, q = quartet, m = multiple. High Resolution Mass spectra were recorded on AB Triple 4600 spectrometer with  $\text{CH}_3\text{CN}$  and  $\text{H}_2\text{O}$  as solvent. All the final compounds were all purified by C18 reverse phase preparative HPLC column with solvent A (0.05% HCl in  $\text{H}_2\text{O}$ ) and solvent B ( $\text{CH}_3\text{CN}$ ) as eluents.

High-performance liquid chroma (HPLC) (SHIMADZU) analysis was carried out at a flow rate of 0.4 mL/min under 254 nm wavelength detection, with a linear gradient elution using the mobile phase A (distilled water with 0.1%TFA) and the mobile phase B (acetonitrile with 0.1% TFA) from 10% B to 90% B in 12 min.

### $\text{H}_2\text{O}_2$ responsive of pre-PROTACs

To determine whether the cleavage of pre-PROTACs is related to generation of ROS, 10  $\mu\text{L}$  pre-PROTACs (10 mM in DMSO) were treated with 20  $\mu\text{L}$   $\text{H}_2\text{O}_2$  (50 mM in PBS buffer) in 50  $\mu\text{L}$  PBS buffer (pH = 7.4) and 20  $\mu\text{L}$   $\text{CH}_3\text{CN}$  for 8 h at 37  $^\circ\text{C}$  and analyzed by HPLC. The time dependent experiment of Pre-PROTAC 7 with  $\text{H}_2\text{O}_2$ . 10  $\mu\text{L}$  pre-PROTAC 7 (10 mM in DMSO) was incubated with the indicated ratio of  $\text{H}_2\text{O}_2$  (20  $\mu\text{L}$  50 mM in PBS buffer) in 50  $\mu\text{L}$  PBS buffer (pH = 7.4) and 20  $\mu\text{L}$   $\text{CH}_3\text{CN}$  at 37  $^\circ\text{C}$  for 2 h, 4 h, 6 h, 8 h and each sample was analyzed by HPLC.

### Pre-PROTAC 7 with different concentration of $\text{H}_2\text{O}_2$

Pre-PROTAC 7 ( 2.5  $\mu\text{L}$  10 mM in DMSO) was incubated in 12.5  $\mu\text{L}$  PBS buffer (pH = 7.4) and 5  $\mu\text{L}$   $\text{CH}_3\text{CN}$  separately with of 1  $\mu\text{L}$ , 3  $\mu\text{L}$ , 9  $\mu\text{L}$ , 27  $\mu\text{L}$   $\text{H}_2\text{O}_2$  (1 mM in PBS buffer) at 37 $^\circ\text{C}$  for 8 h and each sample was analyzed by HPLC.

### The stability of pre-PROTAC 7

Pre-PROTAC 7 (30  $\mu\text{L}$  10 mM in DMSO) was incubated in 120  $\mu\text{L}$  PBS buffer (pH 7.4) and 50  $\mu\text{L}$   $\text{CH}_3\text{CN}$  at 37 $^\circ\text{C}$  for 0 h, 12 h, 24 h, 36 h, 48 h and each sample was analyzed by HPLC.

## Synthesis route and produce of pre-PROTACs

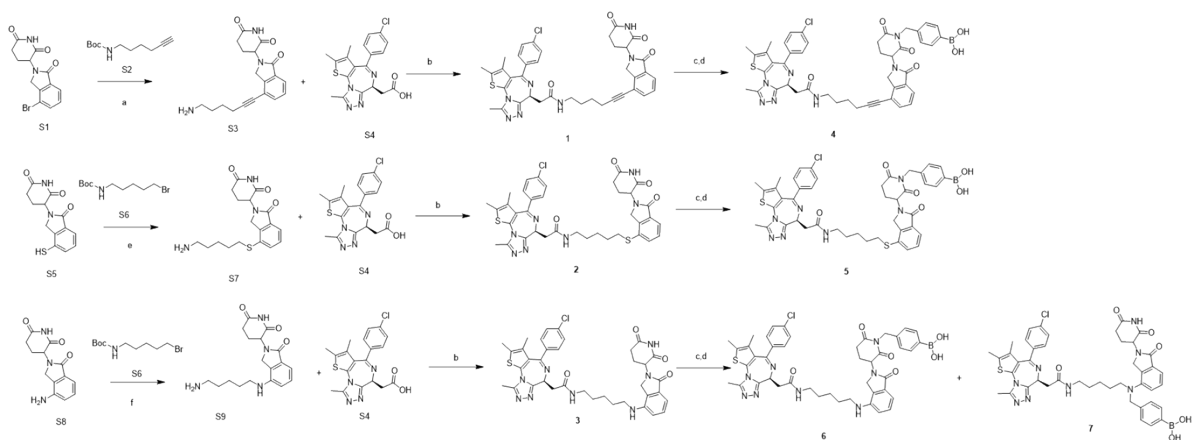

Reagents and conditions:

a) i,  $\text{Pd}(\text{PPh}_3)_2\text{Cl}_2$ ,  $\text{CuI}$ ,  $\text{DMF}$ ,  $\text{TEA}$ ,  $80^\circ\text{C}$ , 8 h; ii,  $\text{TFA}$ ,  $\text{DCM}$ ,  $\text{RT}$ , 12 h;

b)  $\text{HATU}$ ,  $\text{DIPEA}$ ,  $\text{DMF}$ ,  $\text{RT}$ , 12h;

c) 2-(4-(bromomethyl)phenyl)-4,4,5,5-tetramethyl-1,3,2-dioxaborolane,  $\text{NaHMDS}$ ,  $\text{DCM}$ ,  $-78^\circ\text{C}$  to  $\text{RT}$ , 12 h; d) 1 M  $\text{HCl}$  (aq),  $\text{CH}_3\text{CN}/\text{H}_2\text{O}$ ,  $\text{RT}$ , 12h; e)  $\text{K}_2\text{CO}_3$ ,  $\text{DMF}$ ,  $\text{RT}$ , 1 h; f)  $\text{DIPEA}$ ,  $110^\circ\text{C}$ , 2 h; g)

$\text{TFA}$ ,  $\text{DCM}$ ,  $\text{RT}$ , 12 h.

**Scheme S1.** Synthesis of ROS-activated pre-PROTACs **4-7**.

### The route of chemical Synthesis.

3-(4-(6-aminohex-1-yn-1-yl)-1-oxoisindolin-2-yl)piperidine-2,6-dione (**S3**)

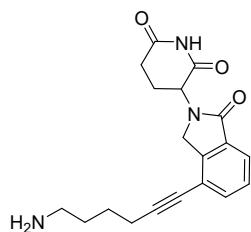

The compound **S1** (200 mg, 0.62 mmol) **S2** (244 mg, 1.24 mmol),  $\text{Pd}(\text{PPh}_3)_2\text{Cl}_2$  (21.7 mg, 0.031 mmol),  $\text{CuI}$  (11.8 mg, 0.062 mmol) and anhydrous  $\text{DMF}$  (10 mL) were added into a 25 mL two-neck-bottle and stirred 5 min at room temperature under  $\text{N}_2$  atmosphere. After the reaction mixture was slowly added 5 mL anhydrous  $\text{Et}_3\text{N}$ , the reaction was stirred at  $80^\circ\text{C}$  for 12 h, Then the reaction mixture was condensed under the vacuum to remove the solution and was purified by column chromatography (5%  $\text{DCM}$  in  $\text{CH}_3\text{OH}$ ) to get the intermediate. (207 mg, crude yield 76%) as brown solid.

Then the intermediate was added into the TFA solution (4 mL TFA in 15 mL DCM) in a 25 mL single bottle and was stirred at room temperature for overnight. Then the reaction mixture was purified by preparative HPLC (10% to 90% acetonitrile/0.05% HCl in H<sub>2</sub>O) to obtain the compound **S3**. White solid, 146 mg (yield 91%). <sup>1</sup>H NMR (500 MHz, Methanol-*d*<sub>4</sub>) δ 9.32 (d, *J* = 7.6 Hz, 1H), 9.18 (d, *J* = 7.8 Hz, 1H), 9.07 (t, *J* = 7.6 Hz, 1H), 6.74 (dd, *J* = 13.4, 5.2 Hz, 1H), 6.09 (d, *J* = 17.5 Hz, 1H), 6.03 (d, *J* = 17.5 Hz, 1H), 4.62 - 4.53 (m, 2H), 4.52 - 4.42 (m, 1H), 4.38 - 4.33 (m, 1H), 4.15 (t, *J* = 6.9 Hz, 2H), 4.13 - 4.02 (m, 1H), 3.78 - 3.73 (m, 1H), 3.45 - 4.39 (m, 2H), 3.35 - 3.25 (m, 2H). <sup>13</sup>C NMR (126 MHz, Methanol-*d*<sub>4</sub>) δ 174.61, 172.22, 170.97, 145.31, 135.86, 133.00, 129.65, 123.90, 120.70, 96.11, 77.88, 57.47, 53.72, 40.38, 32.36, 27.87, 26.54, 24.10, 19.67. HRMS(ESI): calcd for C<sub>19</sub>H<sub>22</sub>N<sub>3</sub>O<sub>3</sub> [M+H]<sup>+</sup>, 340.1656; found, 340.1663.

2-((S)-4-(4-chlorophenyl)-2,3,9-trimethyl-6H-thieno[3,2-f][1,2,4]triazolo[4,3-a][1,4]diazepin-6-yl)-N-(6-(2-(2,6-dioxopiperidin-3-yl)-1-oxoisindolin-4-yl)hex-5-yn-1-yl)acetamide (**1**)

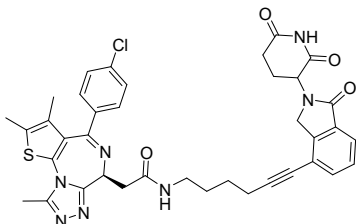

The compound **S4** (35 mg, 0.089 mmol), **S3** (30 mg, 0.089 mmol), DIPEA (34.7 mg, 0.26 mmol) and HATU (38 mg, 0.1 mmol) were dissolved in 5 mL DMF to stir at room temperature for overnight. Then the reaction mixture was diluted with 30 mL H<sub>2</sub>O, extracted with EA, washed with saturated salt solution, dried over Na<sub>2</sub>SO<sub>4</sub>, and was purified by column chromatography (7%DCM in CH<sub>3</sub>OH) to get the compound **1**. White solid, 37 mg (yield 58%). <sup>1</sup>H NMR (500 MHz, DMSO-*d*<sub>6</sub>) δ 10.99 (d, *J* = 11.0 Hz, 1H), 8.30 - 8.23 (m, 1H), 7.71 (d, *J* = 7.6 Hz, 1H), 7.61 (ddd, *J* = 7.6, 3.9, 1.1 Hz, 1H), 7.51 (td, *J* = 7.7, 1.4 Hz, 1H), 7.46 (dd, *J* = 8.9, 2.4 Hz, 2H), 7.42 (d, *J* = 8.6 Hz, 2H), 5.13 (dd, *J* = 12.5, 4.7 Hz, 1H), 4.50 (ddd, *J* = 8.6, 5.8, 4.2 Hz, 1H), 4.44 (d, *J* = 17.7 Hz, 1H), 4.36 - 4.24 (m, 1H), 3.29 - 3.14 (m, 4H), 2.93 - 2.84 (m, 1H), 2.65 - 2.56 (m, 4H), 2.55 - 2.52 (m, 1H), 2.47 - 2.42 (m, 1H), 2.40 (s, 3H), 2.01 - 1.90 (m, 1H), 1.64 (br, 4H), 1.58 (s, 3H). <sup>13</sup>C NMR (126 MHz, Methanol-*d*<sub>4</sub>) δ 174.57, 171.99, 170.89, 167.47, 156.46, 153.15, 145.33, 138.95 (d, *J* = 6.2 Hz), 136.62, 135.72, 134.99, 132.96, 132.67, 132.02, 131.80, 129.98 (d, *J* = 7.1 Hz), 129.62, 123.72, 120.87, 97.04, 77.61, 54.47, 53.62, 40.08, 37.87, 32.29, 29.84, 27.00, 23.95, 19.90, 14.42 (d, *J* = 2.1 Hz), 13.04, 11.49. HRMS(ESI): calcd for C<sub>38</sub>H<sub>37</sub>ClN<sub>7</sub>O<sub>4</sub>S [M+H]<sup>+</sup>, 722.2311; found, 722.2320.

4-((3-(4-(6-(2-((S)-4-(4-chlorophenyl)-2,3,9-trimethyl-6H-thieno[3,2-f][1,2,4]triazolo[4,3-a][1,4]diazepin-6-yl)acetamido)hex-1-yn-1-yl)-1-oxoisindolin-2-yl)-2,6-dioxopiperidin-1-yl)methyl)phenyl)boronic acid (**4**)

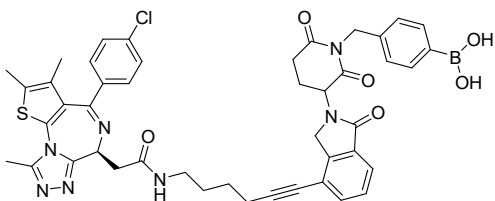

The compound **1** (20 mg, 0.03 mmol) was added to a 25 mL 2-neck-bottle with 8 mL DCM (Dried by CaH). Then NaHMDs (50  $\mu$ L, 0.05 mmol) was slowly added into the mixture to stir at  $-78$   $^{\circ}$ C for 1 h under  $N_2$  atmosphere. After that the compound 2-(4-(bromomethyl)phenyl)-4,4,5,5-tetramethyl-1,3,2-dioxaborolane (12 mg, 0.04 mmol) was dissolved in 1 mL DCM (Dried by CaH) to slowly add into the reaction and stirred at room temperature overnight. After the reaction was completed, the mixture was condensed under the vacuum followed with 2 mL  $CH_3CN/H_2O$  solution ( $CH_3CN/H_2O = 1:1$ ), then 1 mL 1 M HCl (aq) was added to stir at room temperature for overnight. Then the reaction mixture was purified by preparative HPLC (10% to 90% acetonitrile/0.05% HCl in  $H_2O$ ) to obtain the compound **4**. White solid, 5.2 mg (yield 20%).  $^1H$  NMR (500 MHz,  $DMSO-d_6$ )  $\delta$  8.27 (t,  $J = 5.7$  Hz, 1H), 7.73 - 7.66 (m, 3H), 7.60 (dd,  $J = 7.6, 4.3$  Hz, 1H), 7.50 (td,  $J = 7.6, 2.2$  Hz, 1H), 7.46 - 7.38 (m, 4H), 7.17 (d,  $J = 6.2$  Hz, 2H), 5.29 (dt,  $J = 13.5, 4.3$  Hz, 1H), 4.85 - 4.72 (m, 2H), 4.53 - 4.43 (m, 2H), 4.28 (dd,  $J = 17.7, 8.6$  Hz, 1H), 3.25 - 3.13 (m, 4H), 3.10 - 3.03 (m, 1H), 2.78 - 2.71 (m, 1H), 2.58 (s, 3H), 2.54 - 2.51 (m, 3H), 2.37 (d,  $J = 2.6$  Hz, 3H), 2.05 - 1.99 (m, 1H), 1.64 - 1.60 (m, 4H), 1.55 (d,  $J = 3.4$  Hz, 3H).  $^{13}C$  NMR (126 MHz,  $DMSO-d_6$ )  $\delta$  171.89, 170.52, 169.55, 167.82, 155.12, 150.02, 143.78, 136.71, 135.35, 134.48, 134.15, 132.26, 130.92, 130.20, 129.92, 128.51, 126.81, 126.25, 122.73, 118.88, 96.29, 83.67, 76.63, 73.61, 53.93, 45.65, 28.56, 25.52, 25.02, 18.60, 14.04, 12.72, 11.35, 8.62. HRMS(ESI): calcd for  $C_{45}H_{44}BClN_7O_6S$   $[M+H]^+$ , 856.2850; found, 856.2854.

### 3-(4-((5-aminopentyl)thio)-1-oxoisindolin-2-yl)piperidine-2,6-dione (**S7**)

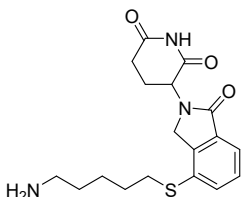

The compound **S5** (1 g, 3.62 mmol), **S6** (1.1 g, 4.34 mmol) and  $K_2CO_3$  (1.5 g, 10.86 mmol) were dissolved in 10 mL DMF to stir for 3h at room temperature. Then the reaction mixture was diluted with 50 mL  $H_2O$ , extracted with EA, washed with saturated salt solution, dried over  $Na_2SO_4$ , and was purified by column chromatography (3% DCM in  $CH_3OH$ ) to get the intermediate.

Then the intermediate was added into the TFA solution (2 mL TFA in 15 mL DCM) in a 25 mL single bottle and was stirred at room temperature for overnight. Then the reaction mixture was purified by preparative HPLC (10% to 90% acetonitrile/0.05% HCl in  $H_2O$ ) to obtain the compound **S7**. White solid, 600 mg (yield 46%).  $^1H$  NMR (500 MHz,  $DMSO-d_6$ )  $\delta$  11.01 (s, 1H), 7.79 (s, 2H), 7.63 (dd,  $J = 7.5, 1.2$  Hz, 1H), 7.59 - 7.50 (m, 2H), 5.13 (dd,  $J = 13.3, 5.1$  Hz, 1H), 4.35 (d,  $J = 17.4$  Hz, 1H), 4.21 (d,  $J = 17.4$  Hz, 1H), 3.08 (t,  $J = 7.2$  Hz, 2H), 2.95 - 2.88 (m, 1H), 2.82 - 2.74 (m, 2H), 2.62 - 2.57 (m, 1H), 2.47 - 2.41 (m, 1H), 2.03 - 1.99 (m, 1H), 1.68 - 1.51 (m, 4H), 1.48 - 1.39 (m, 2H).  $^{13}C$  NMR (126 MHz,  $DMSO-d_6$ )  $\delta$  172.96, 171.08, 167.85, 140.96, 132.05 (d,  $J = 13.1$  Hz), 130.20, 129.23, 120.27,

51.68, 46.71, 31.22 (d,  $J = 9.2$  Hz), 28.08, 26.52, 24.89, 22.39. HRMS(ESI): calcd for  $C_{18}H_{24}N_3O_3S$   $[M+H]^+$ , 362.1533; found, 362.1539.

2-((S)-4-(4-chlorophenyl)-2,3,9-trimethyl-6H-thieno[3,2-f][1,2,4]triazolo[4,3-a][1,4]diazepin-6-yl)-N-(5-((2-(2,6-dioxopiperidin-3-yl)-1-oxoisoindolin-4-yl)thio)pentyl)acetamide (**2**)

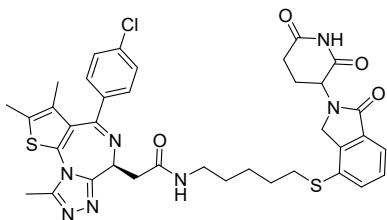

The compound **S4** (473 mg, 1.25 mmol), **S7** (501 mg, 1.25 mmol), DIPEA (487.5 mg, 3.75 mmol) and HATU (544 mg, 1.5 mmol) were dissolved in 10 mL DMF to stir at room temperature for overnight. Then the reaction mixture was diluted with 50 mL  $H_2O$ , extracted with EA, washed with saturated salt solution, dried over  $Na_2SO_4$ , and was purified by column chromatography (7%DCM in  $CH_3OH$ ) to get the compound **2**. Yellow solid, 595 mg (yield 64%).  $^1H$  NMR (500 MHz,  $DMSO-d_6$ )  $\delta$  10.97 (s, 1H), 8.18 (t,  $J = 5.7$  Hz, 1H), 7.60 (d,  $J = 7.6$  Hz, 1H), 7.55 (d,  $J = 7.3$  Hz, 1H), 7.51 (d,  $J = 7.5$  Hz, 1H), 7.47 (d,  $J = 8.3$  Hz, 2H), 7.43 - 7.40 (m, 2H), 5.12 (dd,  $J = 13.3, 5.0$  Hz, 1H), 4.55- 4.45 (m, 1H), 4.35 (dd,  $J = 17.4, 3.0$  Hz, 1H), 4.20 (dd,  $J = 17.2, 4.4$  Hz, 1H), 3.27 - 3.02 (m, 6H), 2.95 - 2.86 (m, 1H), 2.59 (s, 3H), 2.56 (br, 1H), 2.47 - 2.40 (m, 1H), 2.40 (s, 3H), 2.02 - 1.96 (m, 1H), 1.64 - 1.59 (m, 5H), 1.46 (br, 4H).  $^{13}C$  NMR (126 MHz, Methanol- $d_4$ )  $\delta$  174.63, 172.71, 172.09, 171.19, 166.24, 157.02, 152.22, 143.10, 138.04 (d,  $J = 8.4$  Hz), 133.95, 133.51, 133.25, 133.10, 132.54 (d,  $J = 9.6$  Hz), 132.02, 131.31, 130.34, 129.79 (d,  $J = 6.4$  Hz), 121.74, 55.25, 53.69 (d,  $J = 6.7$  Hz), 43.53, 40.13, 38.85, 33.53 (d,  $J = 5.8$  Hz), 32.33, 29.88 (d,  $J = 16.3$  Hz), 26.86, 24.05, 14.40, 12.92, 11.61, 11.56. HRMS(ESI): calcd for  $C_{37}H_{39}ClN_7O_4S_2$   $[M+H]^+$ , 744.2188; found, 744.2194.

4-((3-(4-((S)-4-(4-chlorophenyl)-2,3,9-trimethyl-6H-thieno[3,2-f][1,2,4]triazolo[4,3-a][1,4]diazepin-6-yl)acetamido)pentyl)thio)-1-oxoisoindolin-2-yl)-2,6-dioxopiperidin-1-yl)methyl)phenyl)boronic acid (**5**)

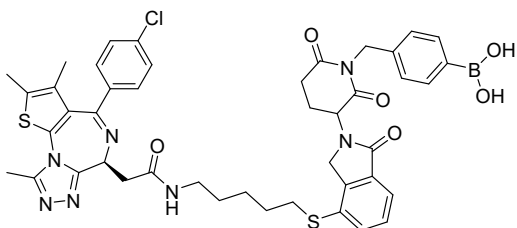

The compound **5** was obtained from the substitution of **2** and 2-(4-(bromomethyl)phenyl)-4,4,5,5-tetramethyl-1,3,2-dioxaborolane according the similar process of **4**. White solid, 6.5 mg (yield 10%).  $^1H$  NMR (500 MHz,  $DMSO-d_6$ )  $\delta$  8.21 (t,  $J = 5.7$  Hz, 1H), 7.71 (d,  $J = 7.6$  Hz, 2H), 7.64 - 7.54 (m, 2H), 7.53 - 7.39 (m, 5H), 7.19 (d,  $J = 7.3$  Hz, 2H), 5.30 (dd,  $J = 13.4, 5.1$  Hz, 1H), 4.83 (qd,  $J = 15.1, 3.6$  Hz, 2H), 4.54 (t,  $J = 7.1$  Hz, 1H), 4.38 (d,  $J = 17.3$  Hz, 1H), 4.19 (d,  $J = 17.3$  Hz, 1H), 3.27 - 3.20 (m, 2H), 3.08 (dt,  $J = 23.3, 7.0$  Hz, 4H), 2.80 (d,  $J = 16.5$  Hz, 1H), 2.61 (s, 3H), 2.56 - 2.52 (m,

1H), 2.40 (s, 3H), 2.09 - 2.05 (m, 1H), 1.67 - 1.59 (m, 1H), 1.60 (d,  $J = 3.5$  Hz, 2H), 1.49 - 1.43 (m, 4H).  $^{13}\text{C}$  NMR (126 MHz, DMSO- $d_6$ )  $\delta$  171.87, 170.57, 169.36, 167.94, 163.32, 155.06, 150.14, 140.80, 139.00, 136.52, 135.45, 134.14, 132.17 (d,  $J = 8.5$  Hz), 132.01, 131.13, 130.25, 130.07, 129.95, 129.72, 129.24, 128.52, 126.21, 120.18, 53.82, 52.38, 46.88, 42.92, 38.24, 37.53, 34.28, 31.41, 28.72, 28.31, 25.48, 21.70, 14.07, 12.73, 11.31. HRMS(ESI): calcd for  $\text{C}_{44}\text{H}_{46}\text{BCIN}_7\text{O}_6\text{S}_2$   $[\text{M}+\text{H}]^+$ , 878.2727; found, 878.2734.

3-(4-((5-aminopentyl)- $\lambda^2$ -azaneyl)-1-oxoisindolin-2-yl)piperidine-2,6-dione (**S9**)

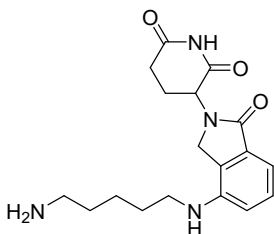

The synthesis of compound **S9** was according the route of compound **9c** in *Org. Lett.* 2019, 21, 3838–3841. Yellow liquid, 234 mg (yield 68%).  $^1\text{H}$  NMR (500 MHz, DMSO)  $\delta$  11.01 (s, 1H), 7.29 (t,  $J = 7.7$  Hz, 1H), 6.94 (d,  $J = 7.1$  Hz, 1H), 6.75 (d,  $J = 8.0$  Hz, 1H), 5.12 (dd,  $J = 13.3, 5.1$  Hz, 1H), 4.27 - 4.07 (m, 2H), 3.13 (t,  $J = 7.0$  Hz, 2H), 2.98 - 2.88 (m, 1H), 2.84 - 2.75 (m, 2H), 2.67 - 2.57 (m, 1H), 2.35 - 2.22 (m, 1H), 2.08 - 1.99 (m, 1H), 1.65 - 1.51 (m, 4H), 1.45 - 1.37 (m, 2H).  $^{13}\text{C}$  NMR (126 MHz, DMSO)  $\delta$  173.38, 171.71, 169.34, 159.39, 159.09, 158.80, 158.50, 143.88, 132.56, 129.70, 127.18, 119.36, 117.05, 114.74, 112.52, 112.44, 110.81, 51.97, 46.18, 43.04, 39.26, 31.69, 28.30, 27.26, 23.85, 23.27. HRMS(ESI): calcd for  $\text{C}_{18}\text{H}_{24}\text{N}_4\text{O}_3$   $[\text{M}+\text{H}]^+$ , 344.1843; found, 344.1847.

2-((S)-4-(4-chlorophenyl)-2,3,9-trimethyl-6H-thieno[3,2-f][1,2,4]triazolo[4,3-a][1,4]diazepin-6-yl)-N-(5-((2-(2,6-dioxopiperidin-3-yl)-1-oxoisindolin-4-yl)amino)pentyl)acetamide (**3**)

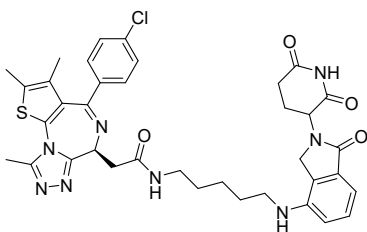

The synthesis of compound **3** was according the route of compound **SIAIS213110** in *Org. Lett.* 2019, 21, 3838–3841. Yellow solid, 112 mg (yield 60%).  $^1\text{H}$  NMR (500 MHz, Methanol- $d_4$ )  $\delta$  7.50 (d,  $J = 8.6$  Hz, 2H), 7.46 - 7.39 (m, 3H), 7.30 (d,  $J = 6.7$  Hz, 1H), 7.07 (d,  $J = 7.3$  Hz, 1H), 5.13 (dd,  $J = 13.3, 5.2$  Hz, 1H), 4.78 (dd,  $J = 8.6, 5.7$  Hz, 1H), 4.42 (d,  $J = 17.1$  Hz, 1H), 4.37 (d,  $J = 17.1$  Hz, 1H), 3.43 (dd,  $J = 15.3, 8.7$  Hz, 1H), 3.34 (d,  $J = 5.8$  Hz, 1H), 3.30 - 3.27 (m, 4H), 2.93 - 2.84 (m, 1H), 2.81 (s, 3H), 2.78 - 2.73 (m, 1H), 2.46 (s, 3H), 2.44 - 2.41 (m, 1H), 2.18 - 2.14 (m, 1H), 1.78 - 1.72 (m, 2H), 1.68 (s, 3H), 1.66 - 1.61 (m, 2H), 1.55 - 1.48 (m, 2H).  $^{13}\text{C}$  NMR (126 MHz, Methanol- $d_4$ )  $\delta$  174.60, 172.18, 171.94, 171.60, 167.59, 156.44, 153.17, 139.15, 136.53, 135.08, 133.76, 132.70, 131.98, 130.94, 130.43, 130.03, 115.84, 54.41, 53.61, 47.40, 46.50, 40.09, 37.64, 32.34, 30.13, 28.85, 25.13, 24.19, 14.41, 13.03, 11.47. HRMS(ESI): calcd for  $\text{C}_{37}\text{H}_{40}\text{ClN}_8\text{O}_4\text{S}$   $[\text{M}+\text{H}]^+$ , 727.2576; found, 727.2573.

(4-((3-(4-((5-(2-((S)-4-(4-chlorophenyl)-2,3,9-trimethyl-6H-thieno[3,2-f][1,2,4]triazolo[4,3-a][1,4]diazepin-6-yl)acetamido)pentyl)amino)-1-oxoisoindolin-2-yl)-2,6-dioxopiperidin-1-yl)methyl)phenyl)boronic acid (**6**)

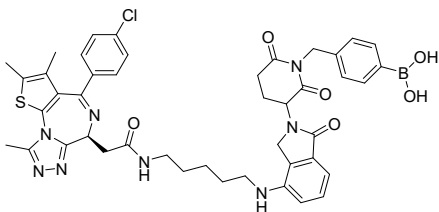

The compound **3** (60 mg, 0.08 mmol) was added to a 25 mL 2-neck-bottle with 10 mL DCM (Dried by CaH). Then NaHMDs (120  $\mu$ L, 0.12 mmol) was slowly added into the mixture to stir at  $-78^{\circ}\text{C}$  for 1 h under  $\text{N}_2$  atmosphere. After that the compound 2-(4-(bromomethyl)phenyl)-4,4,5,5-tetramethyl-1,3,2-dioxaborolane (36 mg, 0.12 mmol) was dissolved in 1mL DCM (Dried by CaH) to slowly add into the reaction and stirred at room temperature overnight. After the reaction was completed, the mixture was condensed under the vacuum followed with 2 mL  $\text{CH}_3\text{CN}/\text{H}_2\text{O}$  solution ( $\text{CH}_3\text{CN}/\text{H}_2\text{O} = 1:1$ ), then 1 mL 1 M HCl (aq) was added to stir at room temperature for overnight. Then the reaction mixture was purified by preparative HPLC (10% to 90% acetonitrile/0.05% HCl in  $\text{H}_2\text{O}$ ) to obtain the compound **6**. White solid, 6.3 mg (yield 9%).  $^1\text{H}$  NMR (500 MHz,  $\text{DMSO}-d_6$ )  $\delta$  8.23 (d,  $J = 4.7$  Hz, 1H), 7.77 (d,  $J = 7.8$  Hz, 1H), 7.67 (d,  $J = 7.5$  Hz, 2H), 7.49 (d,  $J = 8.4$  Hz, 2H), 7.42 (d,  $J = 8.3$  Hz, 2H), 7.36 (dd,  $J = 16.3, 7.8$  Hz, 2H), 7.24 (d,  $J = 7.5$  Hz, 3H), 4.74 (s, 1H), 4.72 - 4.68 (m, 1H), 4.58 (t,  $J = 7.2$  Hz, 1H), 4.50 (s, 3H), 3.29 (br, 2H), 3.23 - 3.17 (m, 3H), 3.06 (d,  $J = 6.6$  Hz, 2H), 2.66 (s, 3H), 2.41 (s, 3H), 2.27 - 2.23 (m, 1H), 2.17 - 2.12 (m, 1H), 2.09 - 2.02 (m, 1H), 1.59 (s, 3H), 1.53 - 1.46 (m, 2H), 1.42 - 1.37 (m, 2H), 1.32 - 1.19 (m, 2H).  $^{13}\text{C}$  NMR (126 MHz,  $\text{DMSO}-d_6$ )  $\delta$  173.67, 173.31, 172.30, 171.97, 169.11, 163.96, 154.81, 150.77, 139.33, 136.03, 135.82, 134.47, 134.26, 133.67, 131.89, 130.54, 130.22, 129.97, 128.61, 127.89, 53.48, 47.24, 46.26, 38.41, 37.09, 31.61, 30.67, 28.97, 24.79 (d,  $J = 26.2$  Hz), 23.71, 14.11, 12.82. HRMS(ESI): calcd for  $\text{C}_{44}\text{H}_{47}\text{BClN}_8\text{O}_6\text{S}$   $[\text{M}+\text{H}]^+$ , 861.3115; found, 861.3123.

(4-(((5-(2-((S)-4-(4-chlorophenyl)-2,3,9-trimethyl-6H-thieno[3,2-f][1,2,4]triazolo[4,3-a][1,4]diazepin-6-yl)acetamido)pentyl)(2-(2,6-dioxopiperidin-3-yl)-1-oxoisoindolin-4-yl)amino)methyl)phenyl)boronic acid (**7**)

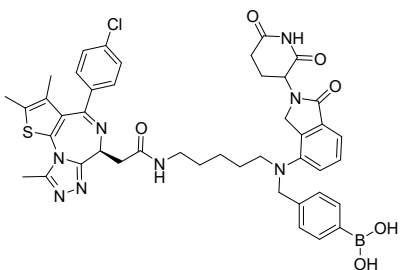

The compound **7** was obtained through the same route of compound **6**. White solid, 7.4 mg (yield



10%). <sup>1</sup>H NMR (500 MHz, DMSO-*d*<sub>6</sub>) δ 10.96 (d, *J* = 8.6 Hz, 1H), 8.18 (t, *J* = 5.7 Hz, 1H), 7.69 (d, *J* = 7.7 Hz, 2H), 7.48 (d, *J* = 8.1 Hz, 2H), 7.42 (d, *J* = 8.4 Hz, 2H), 7.34 (t, *J* = 7.7 Hz, 1H), 7.22 (d, *J* = 7.4 Hz, 3H), 7.11 (d, *J* = 8.1 Hz, 1H), 5.06 (dd, *J* = 13.3, 5.2 Hz, 1H), 4.54 (t, *J* = 7.1 Hz, 1H), 4.47 - 4.31 (m, 4H), 3.24 - 3.16 (m, 4H), 3.11 - 3.04 (m, 2H), 2.92 - 2.81 (m, 1H), 2.62 (s, 3H), 2.60 - 2.55 (m, 1H), 2.46 - 2.43 (m, 1H), 2.41 (s, 3H), 2.00 - 1.95 (m, 1H), 1.59 (s, 3H), 1.50 (p, *J* = 7.7 Hz, 2H), 1.41 (p, *J* = 7.1 Hz, 2H), 1.27 (p, *J* = 8.2 Hz, 2H). <sup>13</sup>C NMR (126 MHz, DMSO-*d*<sub>6</sub>) δ 173.01, 171.08, 169.19, 168.05, 163.83, 154.89, 150.65, 136.18, 135.74, 134.26, 133.45, 131.74, 130.49, 130.18, 129.94, 128.61, 127.15, 53.58, 51.72, 47.61, 38.39, 37.23, 31.24, 29.00, 26.32, 23.71, 22.48, 14.12, 12.82, 11.33. HRMS(ESI): calcd for C<sub>44</sub>H<sub>47</sub>BClN<sub>8</sub>O<sub>6</sub>S [M+H]<sup>+</sup>, 861.3115; found, 861.3117.

## Material and methods: Biology

### Cell culture

293T cell line was cultured in 10% FBS and 1% P/S DMEM culture medium. T47D was cultured in 10% FBS, 1% P/S and insulin RPMI-1640 culture medium. All cell lines were examined as mycoplasma free.

### ROS detection

Cell lines were cultured in 96-well plates with 8,000 cells per well. ROS detected using Meilun Reactive Oxygen Species Assay Kit (MA0219). Fluorescence images were taken using inverted fluorescence microscope. Fluorescence intensity was quantified using ImageJ.

### Western blotting

T47D or 293T were seeded in 1 ml culture medium in 24-well plate at the density of 1.5 x 10<sup>5</sup> cell/ml. After treatment of elevated concentrations of compounds, cells were collected and then lysed in SDS lysis buffer with phosphatase inhibitors (TargetMol: C0004) and proteasome inhibitors (Merck: 539134). Antibodies in the study include beta-actin (CST: 5125), BRD3 (Santa Cruse: sc-81202), BRD4 (CST: 13440), Anti-Rabbit IgG,HRP-linked (CST: 7074), Anti-rat IgG,HRP-linked (CST: 7077).

### Cell growth inhibition

T47D or 293T were seeded in 96-well plates with 4,000 cells per well. After cells attached to the bottom, increasing concentrations of different compounds were added into each well. Cell viability were measured via CCK-8 kit (TargetMol, C0005). And IC<sub>50</sub> was calculated using Prism Graphad. All the experiments were repeated three times.

### Degradation signaling study

10 mM NAC (N-Acetyl-L-Cysteine, aladdin) or 2 uM MG132 (Meilun, MB5137) or 0.5 uM MLN4924 (MCE, HY-70062) was pretreated for 1 hour in T47D cell line, and then 100 nM pre-PROTAC(7) was added into cell line. Cells were collected and lysed in SDS lysis buffer after treatment of 6 hours.

### Supplementary Figures

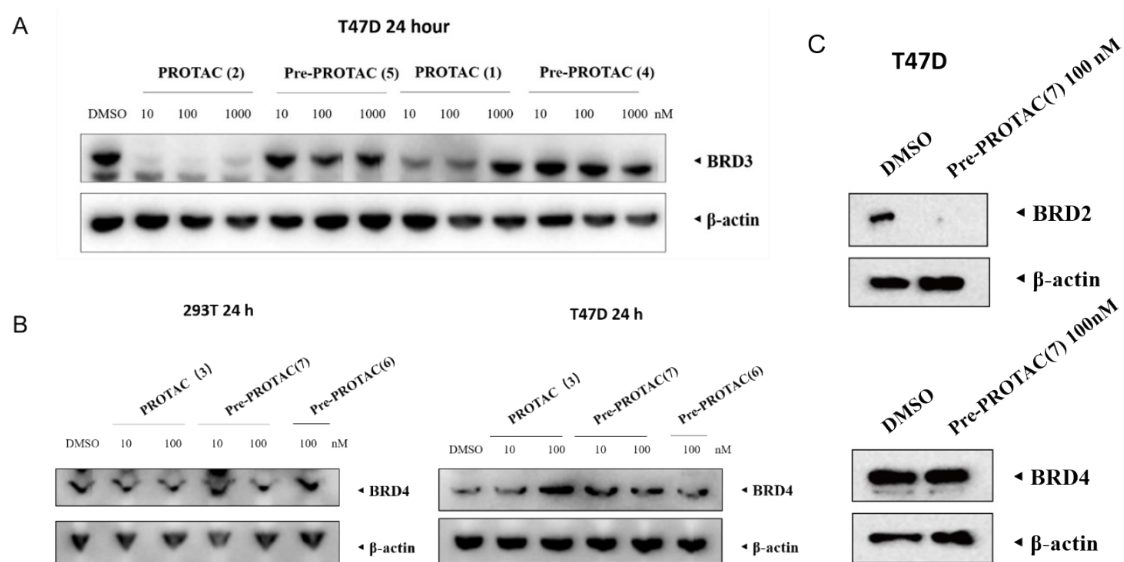

Figure S1. Western blotting of BRD2/3/4 abundance after treatment of different compounds (A) Degradation of BRD3 after treatment of PROTAC (1,2) or Pre-PROTAC (4,5) in T47D cell line; (B) Degradation of BRD4 after treatment of PROTAC(3) or Pre-PROTAC(6,7) in 293T or T47D cell lines. (C) Degradation of BRD2 or BD4 after treatment of Pre-PROTAC(7).

### <sup>1</sup>H and <sup>13</sup>C spectrum

3-(4-(6-aminohex-1-yn-1-yl)-1-oxoisindolin-2-yl)piperidine-2,6-dione (**S3**)

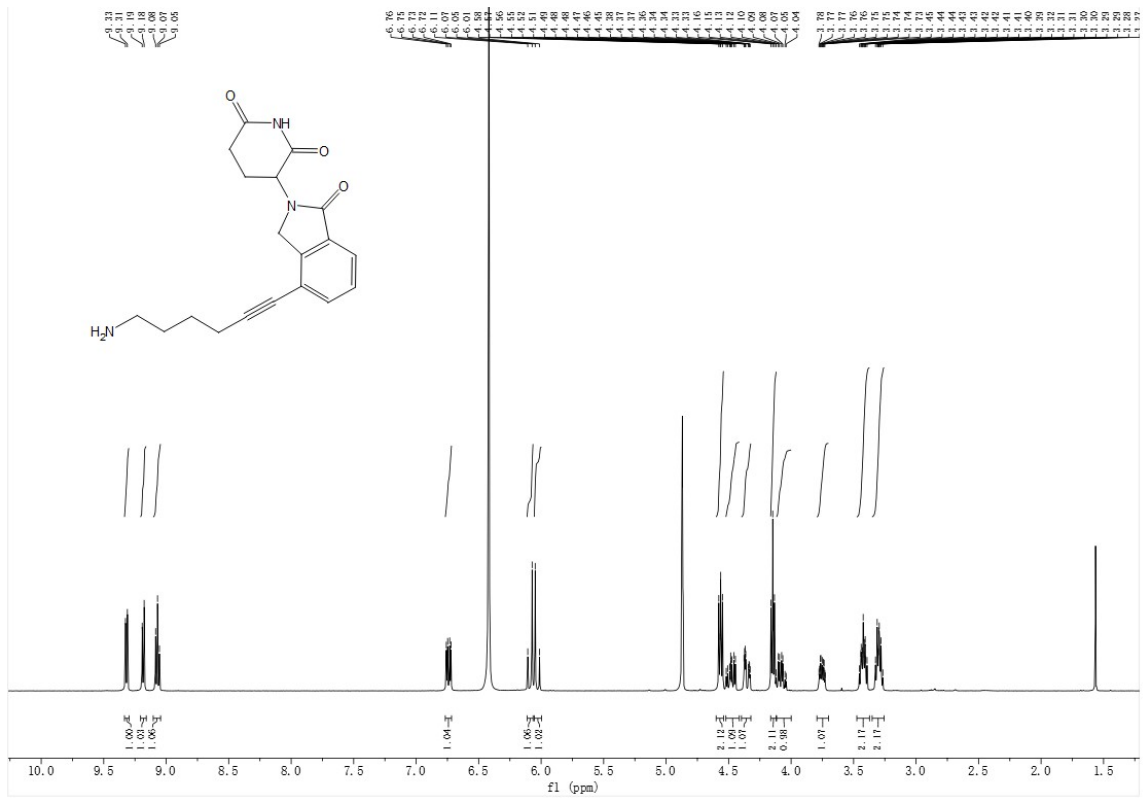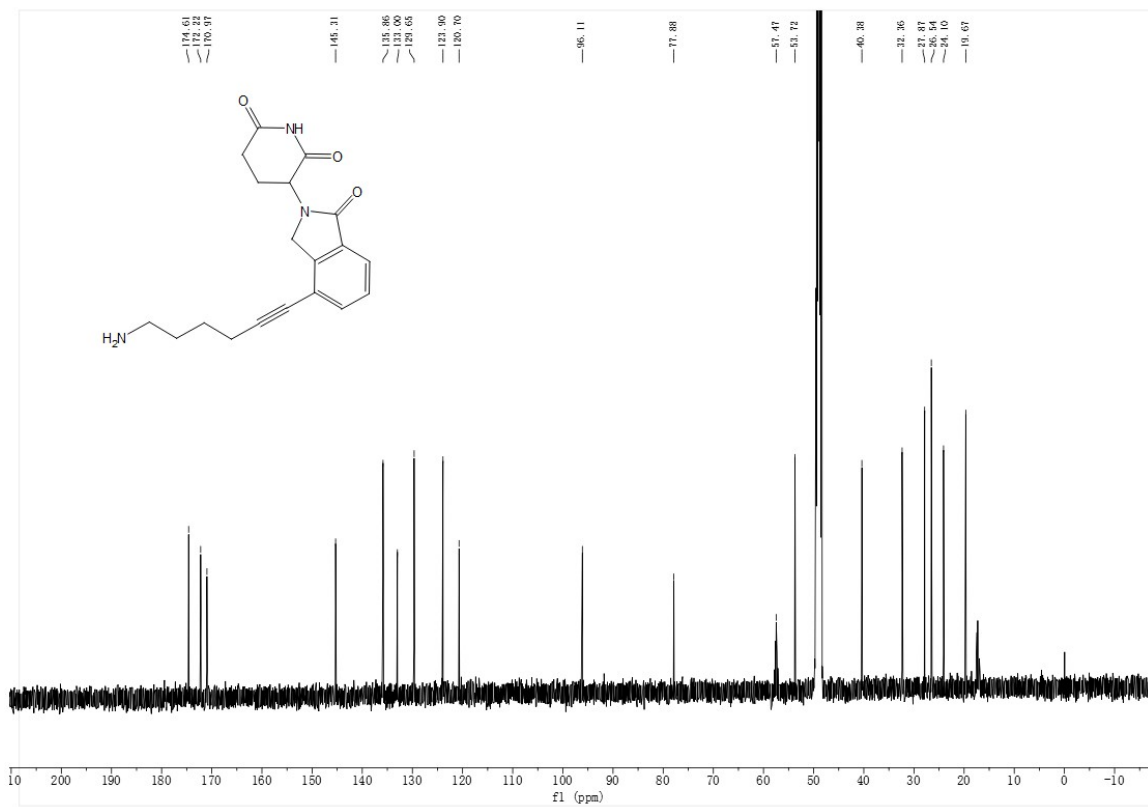

2-((S)-4-(4-chlorophenyl)-2,3,9-trimethyl-6H-thieno[3,2-f][1,2,4]triazolo[4,3-a][1,4]diazepin-6-yl)-N-

(6-(2-(2,6-dioxopiperidin-3-yl)-1-oxoindolin-4-yl)hex-5-yn-1-yl)acetamide (1)

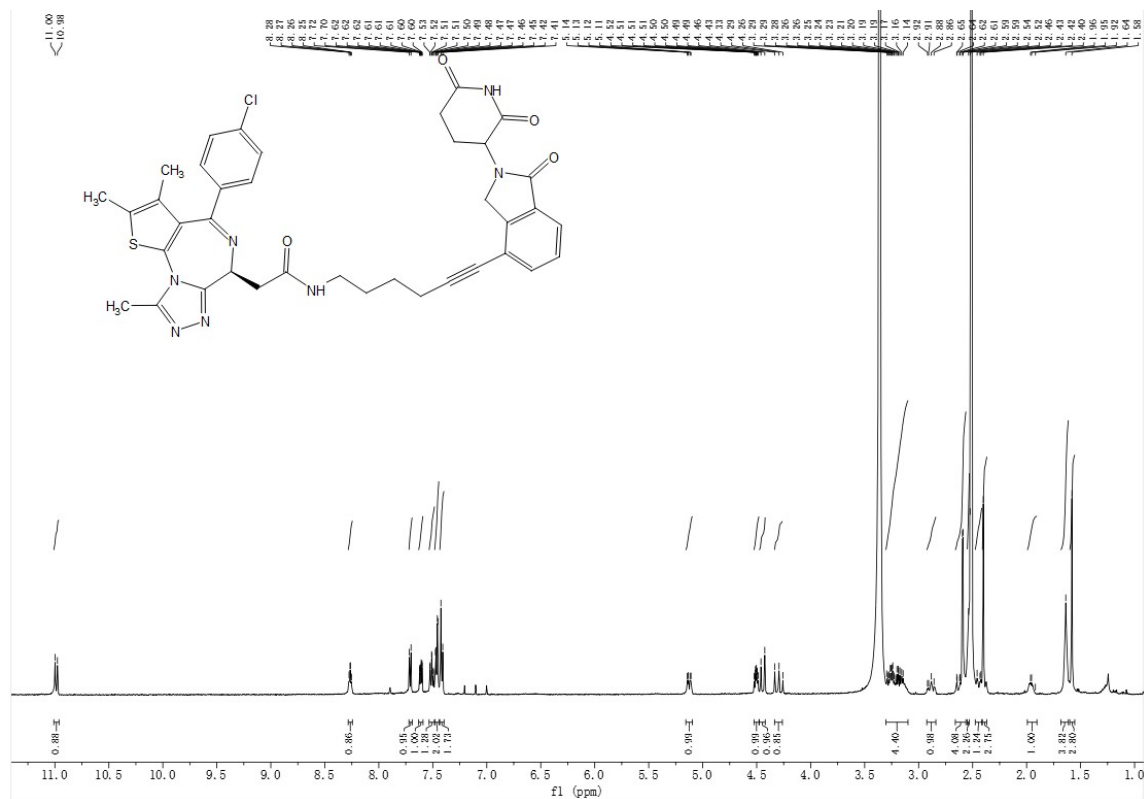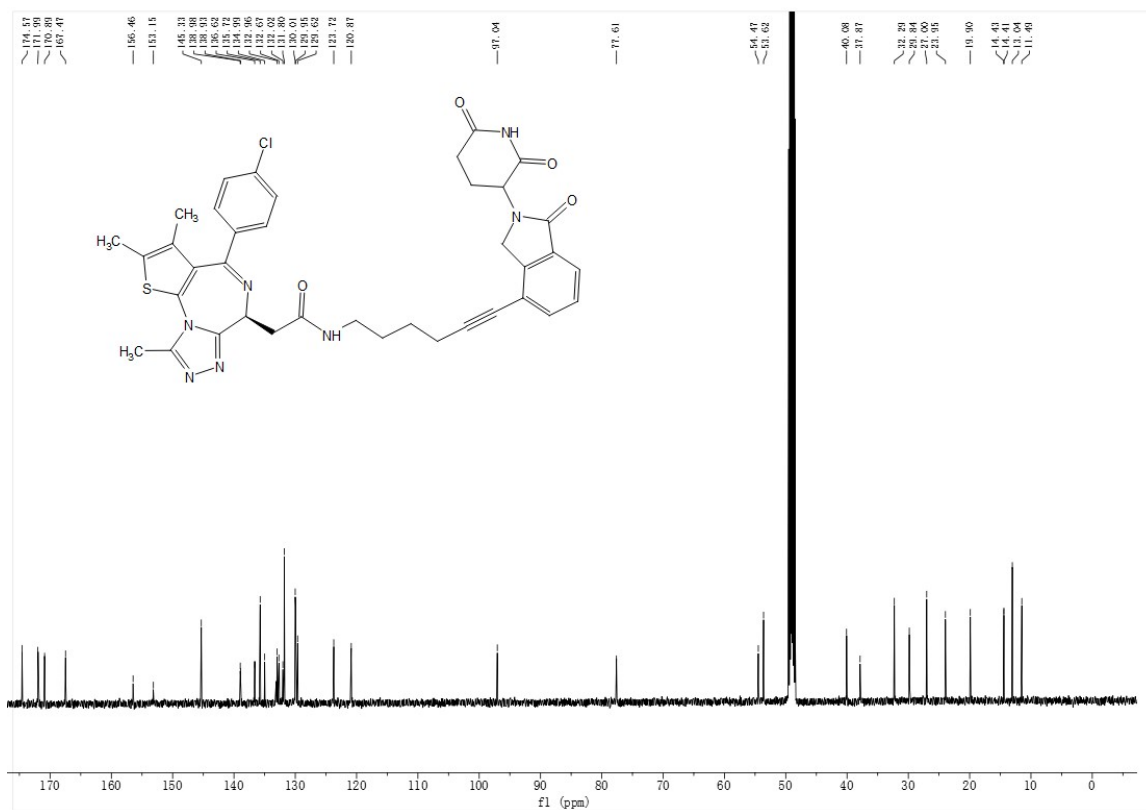

(4-((3-(4-(6-(2-((S)-4-(4-chlorophenyl)-2,3,9-trimethyl-6H-thieno[3,2-f][1,2,4]triazolo[4,3-a][1,4]diazepin-6-yl)acetamido)hex-1-yn-1-yl)-1-oxoisindolin-2-yl)-2,6-dioxopiperidin-1-yl)methyl)phenyl)boronic acid (**4**)

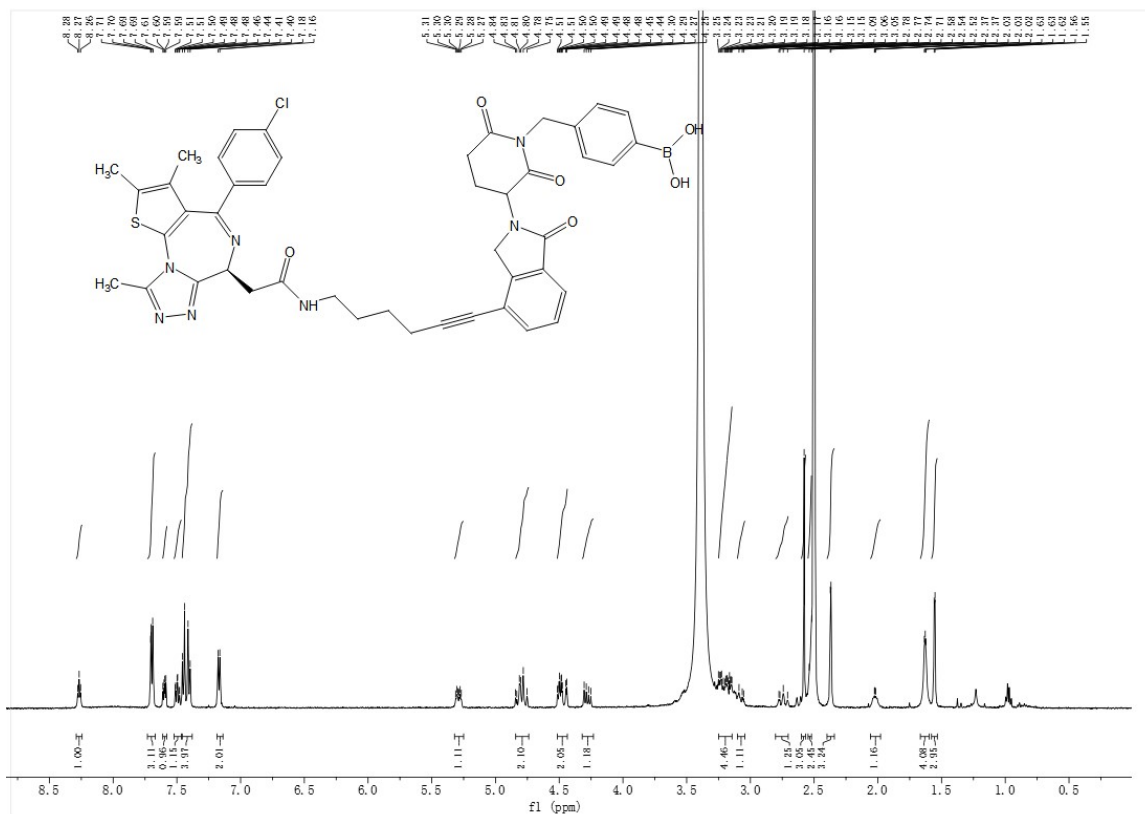

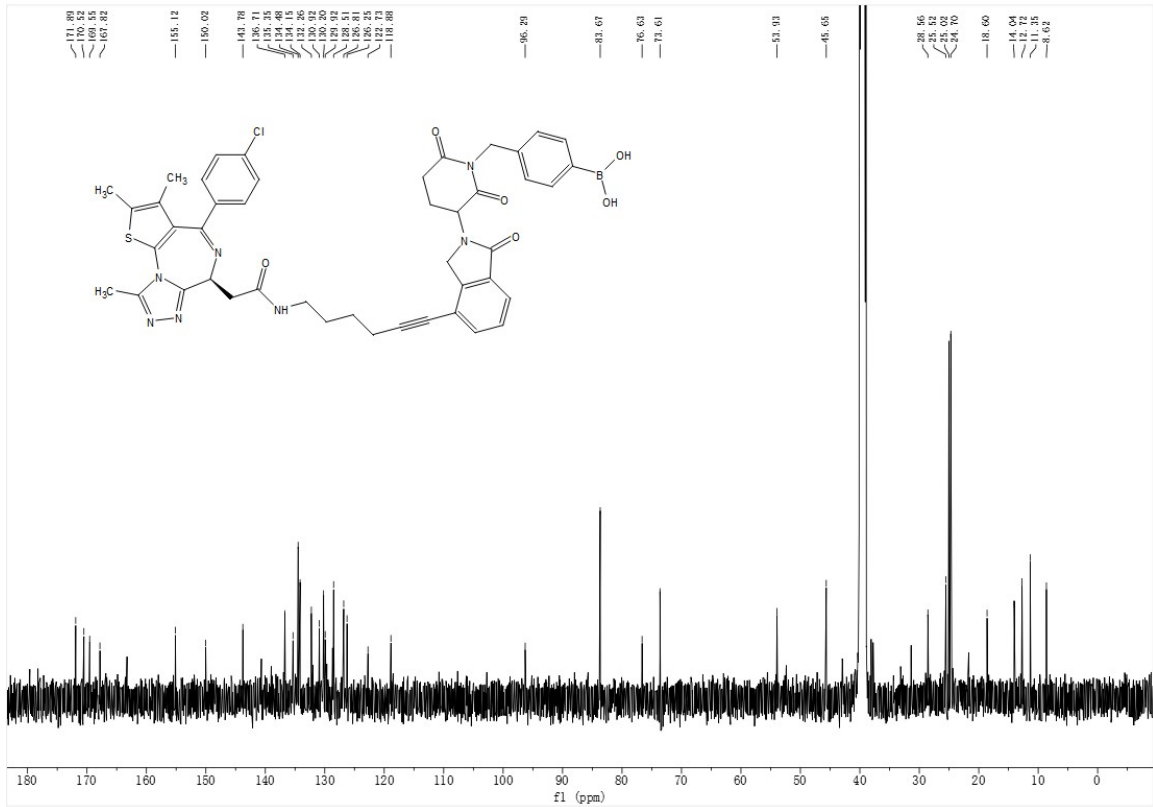

3-(4-((5-aminopentyl)thio)-1-oxisoindolin-2-yl)piperidine-2,6-dione (S7)

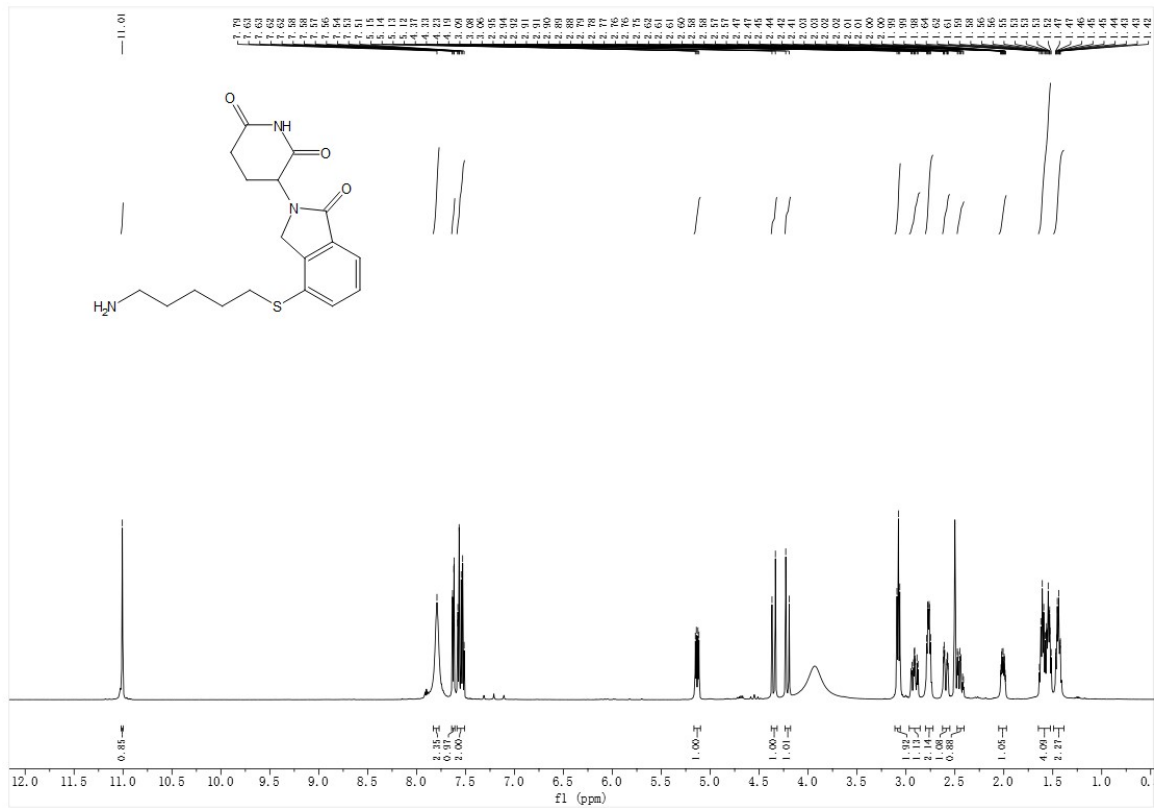

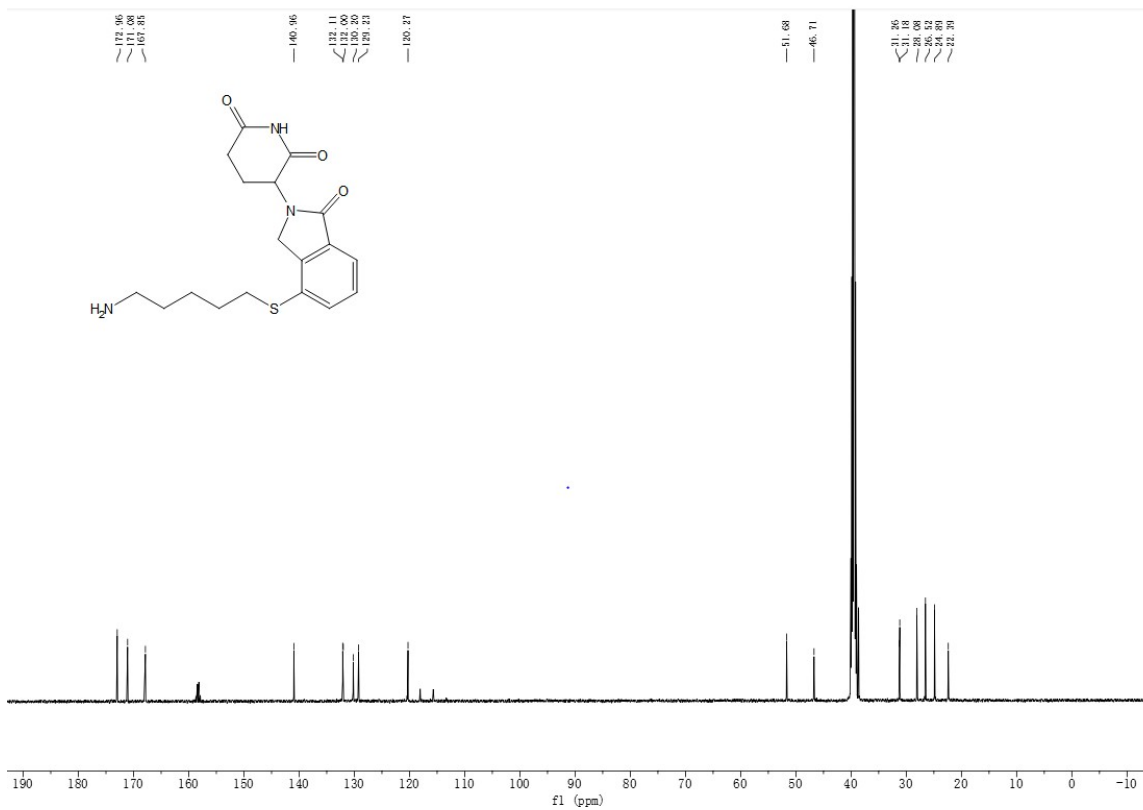

2-((S)-4-(4-chlorophenyl)-2,3,9-trimethyl-6H-thieno[3,2-f][1,2,4]triazolo[4,3-a][1,4]diazepin-6-yl)-N-(5-((2-(2,6-dioxopiperidin-3-yl)-1-oxisoindolin-4-yl)thio)pentyl)acetamide (**2**)

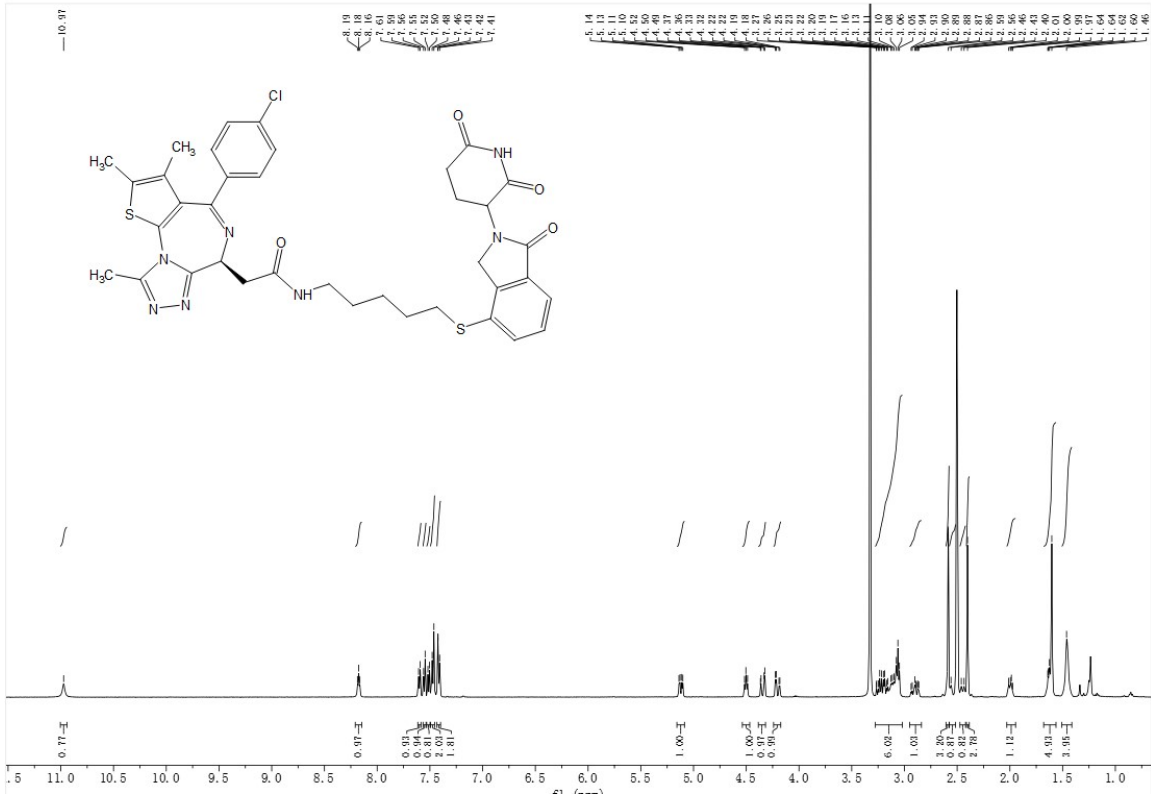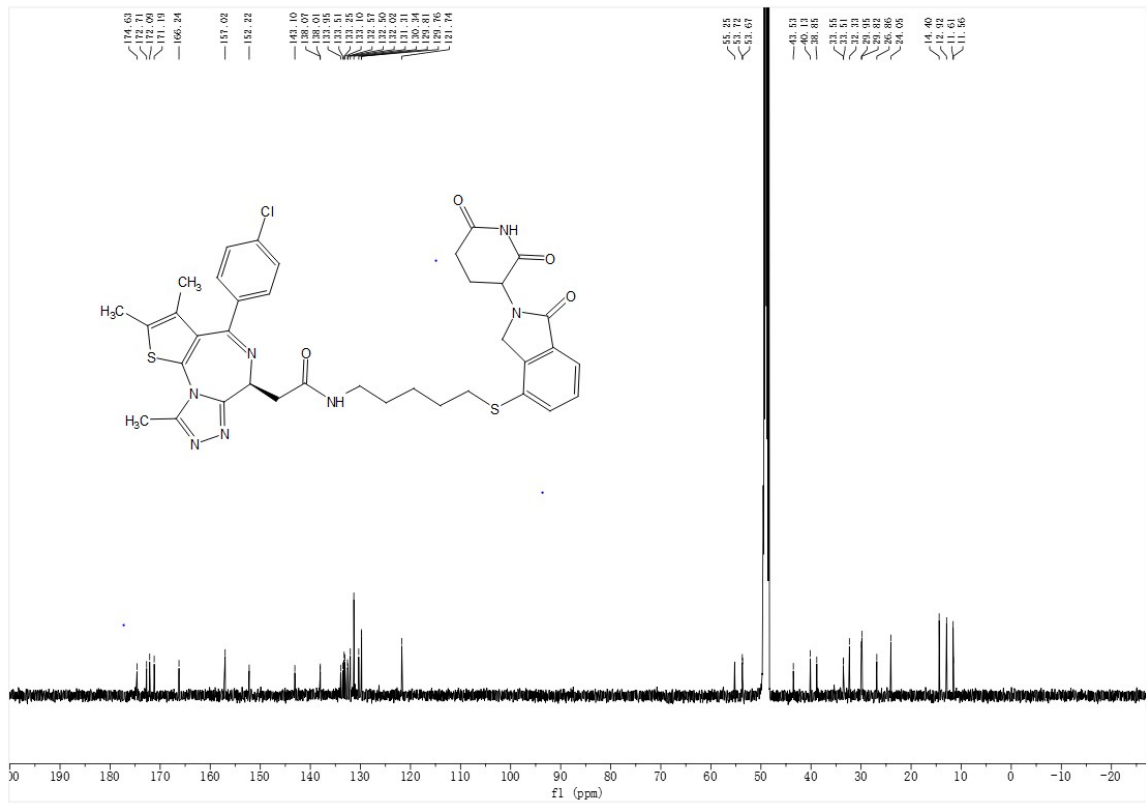



(4-((3-(4-((5-(2-((S)-4-(4-chlorophenyl)-2,3,9-trimethyl-6H-thieno[3,2-f][1,2,4]triazolo[4,3-a][1,4]diazepin-6-yl)acetamido)pentyl)thio)-1-oxoisoindolin-2-yl)-2,6-dioxopiperidin-1-yl)methyl)phenyl)boronic acid (**5**)

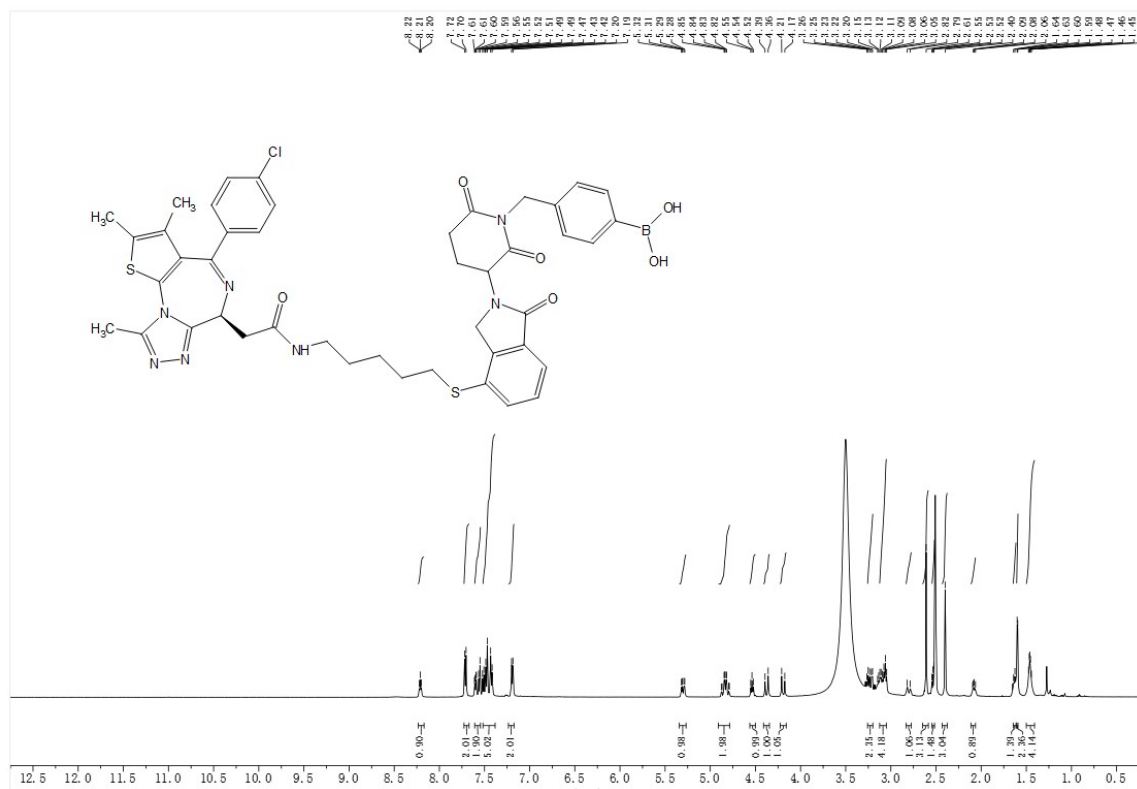

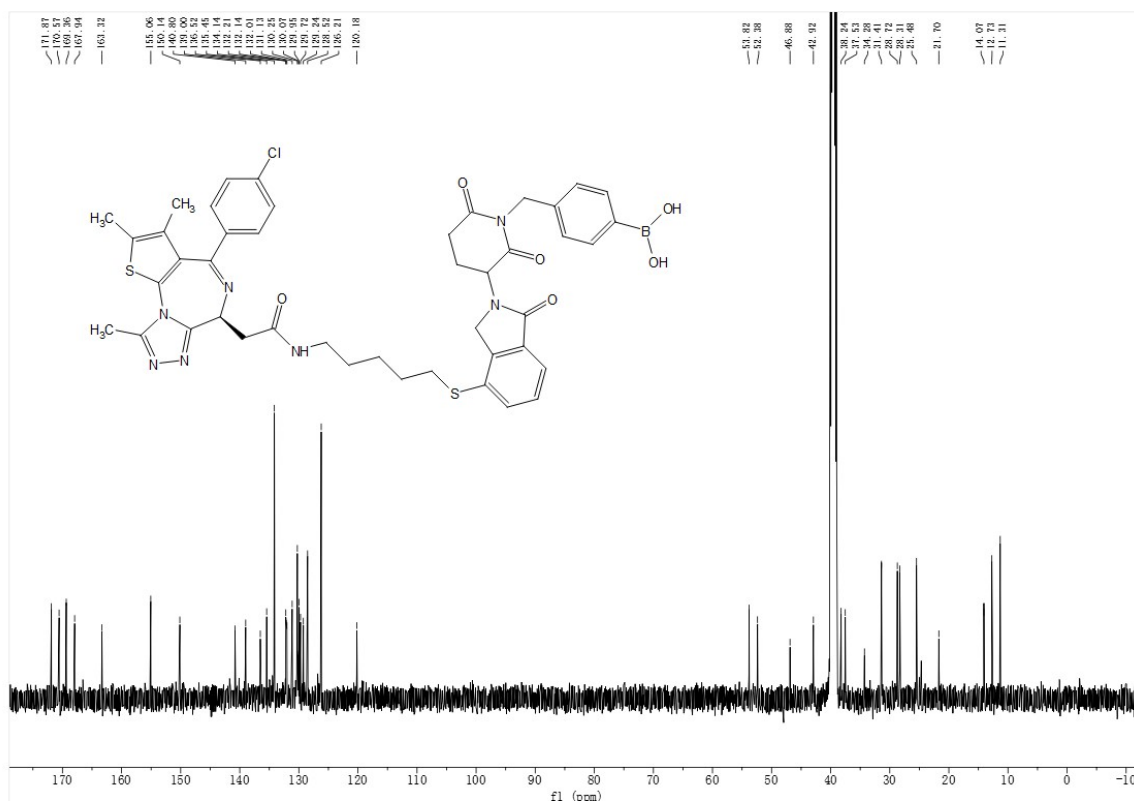

3-(4-((5-aminopentyl)-λ<sup>2</sup>-azaneyl)-1-oxoisindolin-2-yl)piperidine-2,6-dione (S9)

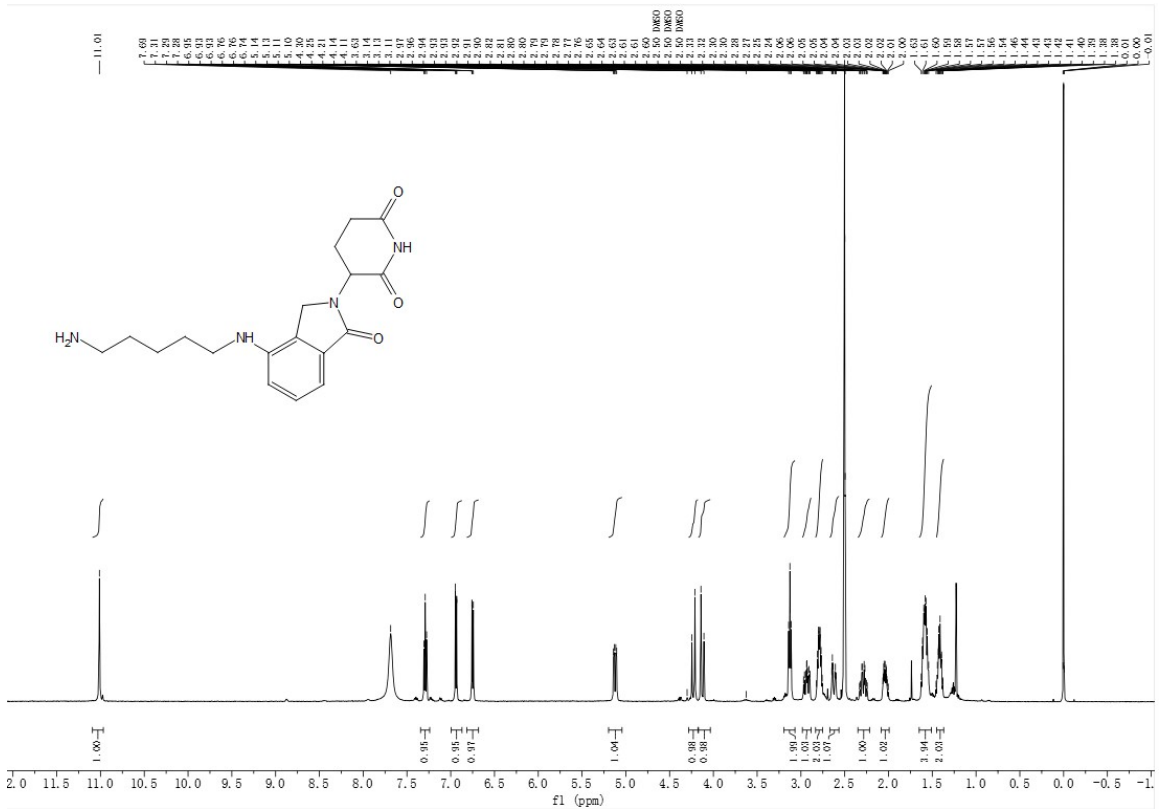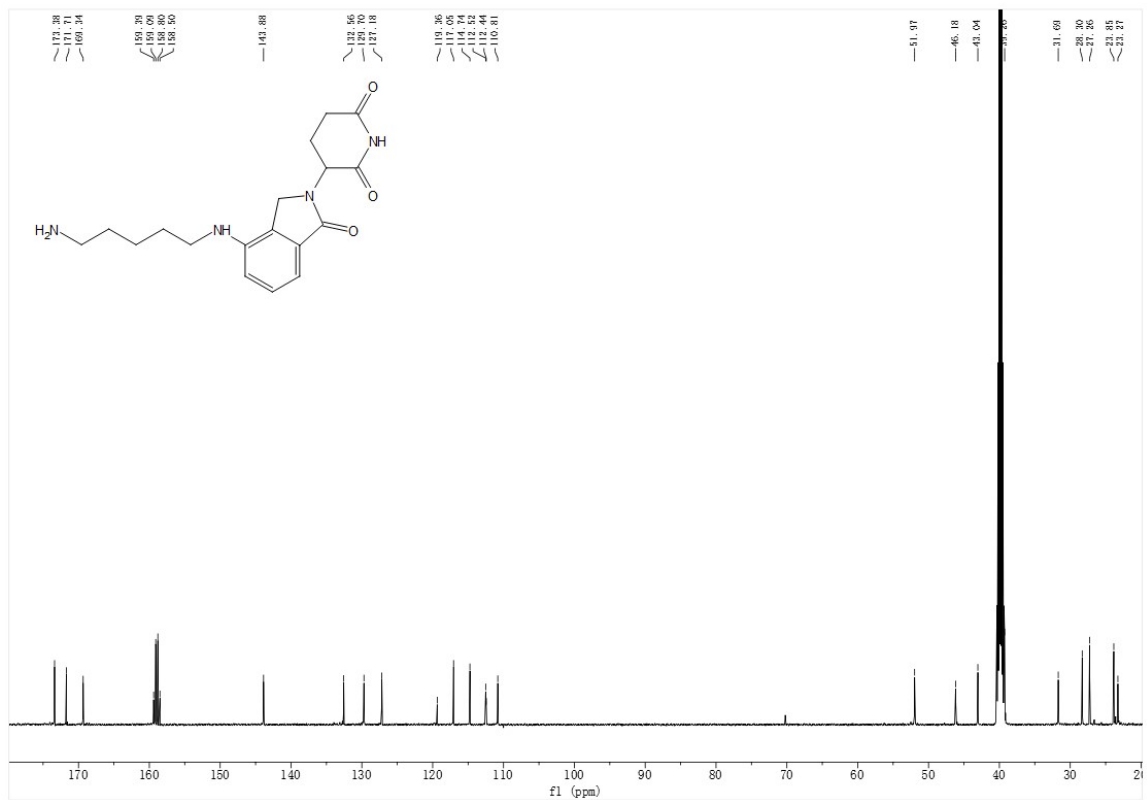

2-((S)-4-(4-chlorophenyl)-2,3,9-trimethyl-6H-thieno[3,2-f][1,2,4]triazolo[4,3-a][1,4]diazepin-6-yl)-N-(5-((2-(2,6-dioxopiperidin-3-yl)-1-oxoisoindolin-4-yl)amino)pentyl)acetamide (3)

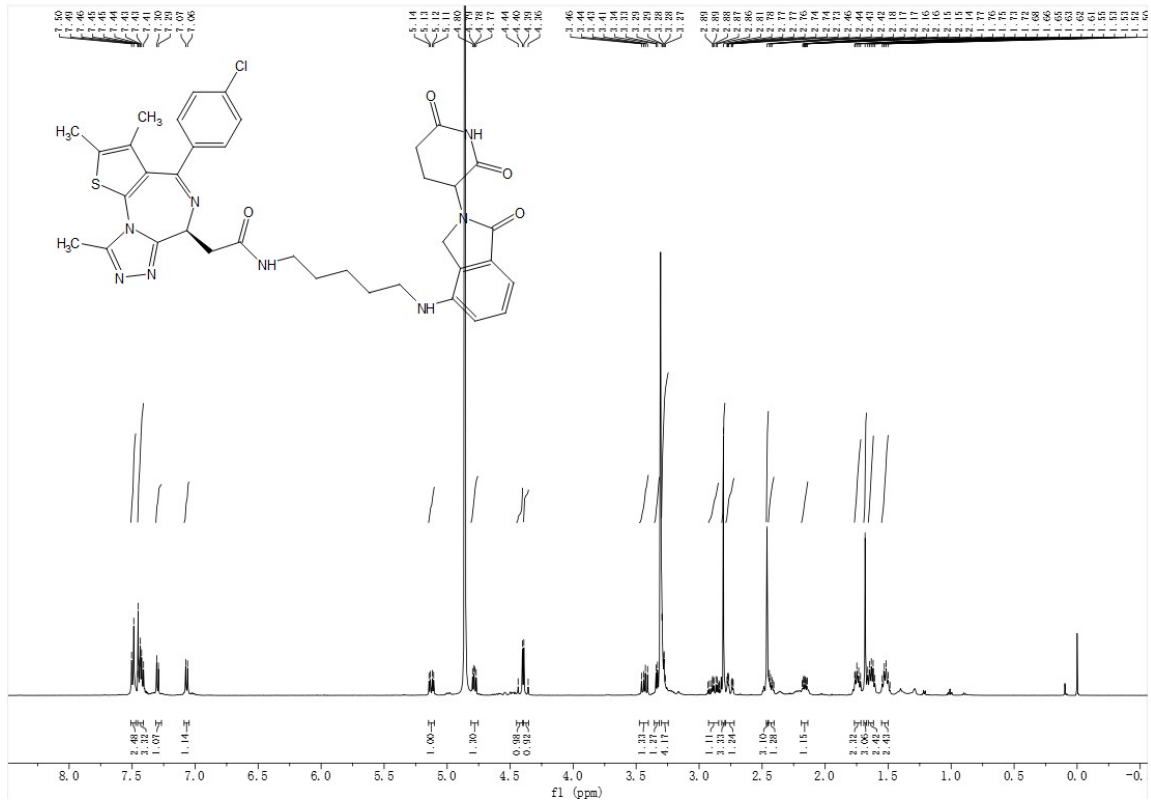

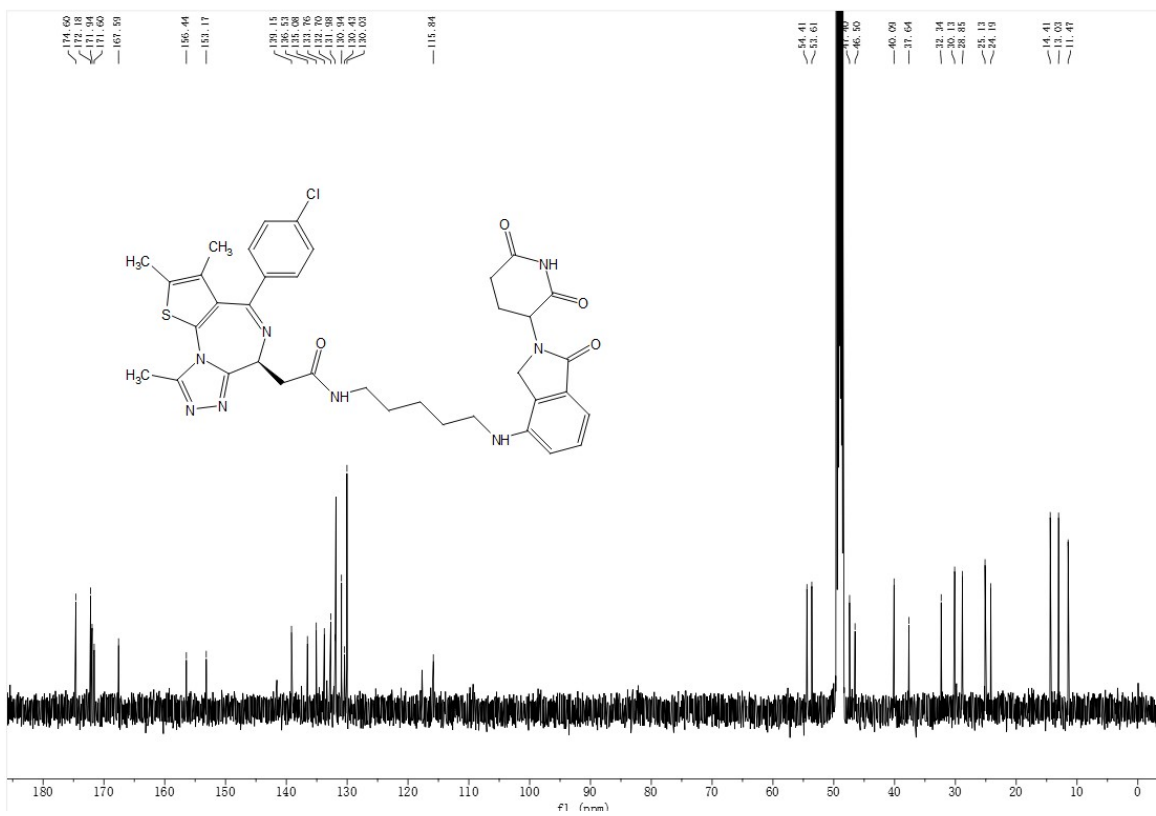

(4-(((5-(2-((S)-4-(4-chlorophenyl)-2,3,9-trimethyl-6H-thieno[3,2-f][1,2,4]triazolo[4,3-a][1,4]diazepin-6-yl)acetamido)pentyl)(2-(2,6-dioxopiperidin-3-yl)-1-oxoisoindolin-4-yl)amino)methyl)phenyl)boronic acid (7)

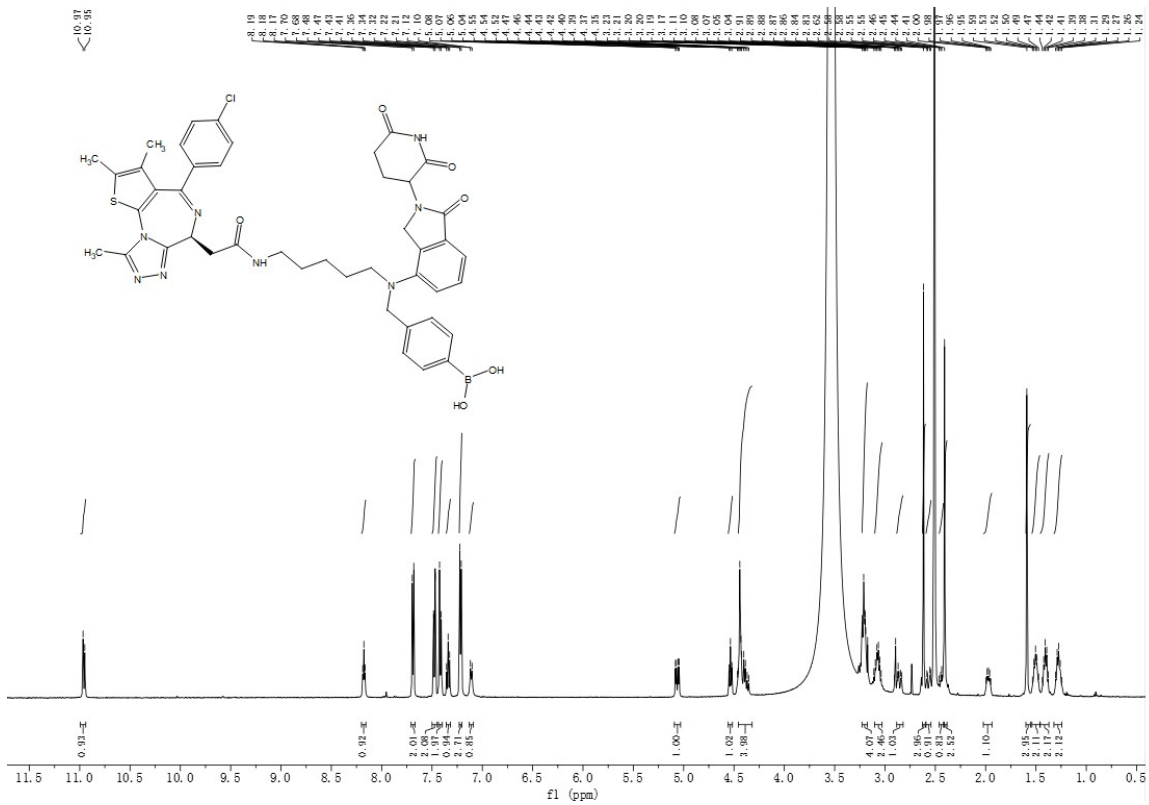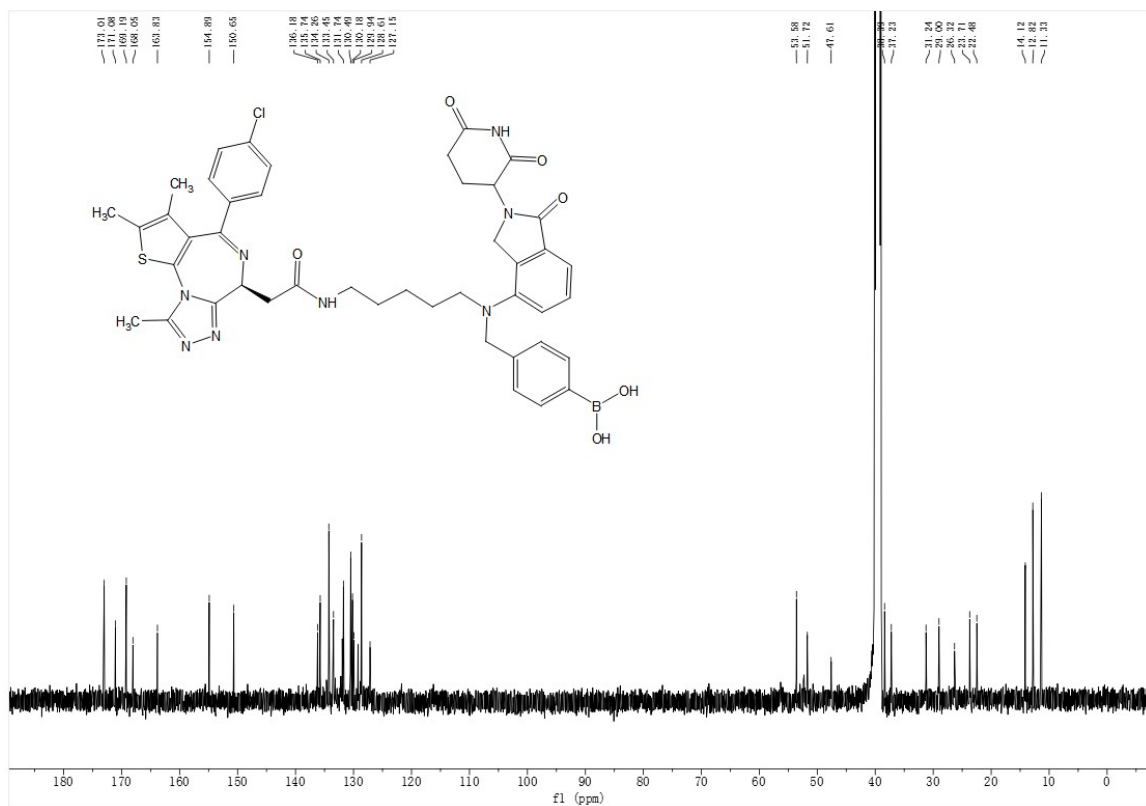

(4-((3-(4-((5-(2-((S)-4-(4-chlorophenyl)-2,3,9-trimethyl-6H-thieno[3,2-f][1,2,4]triazolo[4,3-

a[1,4]diazepin-6-yl)acetamido)pentyl)amino)-1-oxoisindolin-2-yl)-2,6-dioxopiperidin-1-yl)methyl)phenyl)boronic acid (**6**)

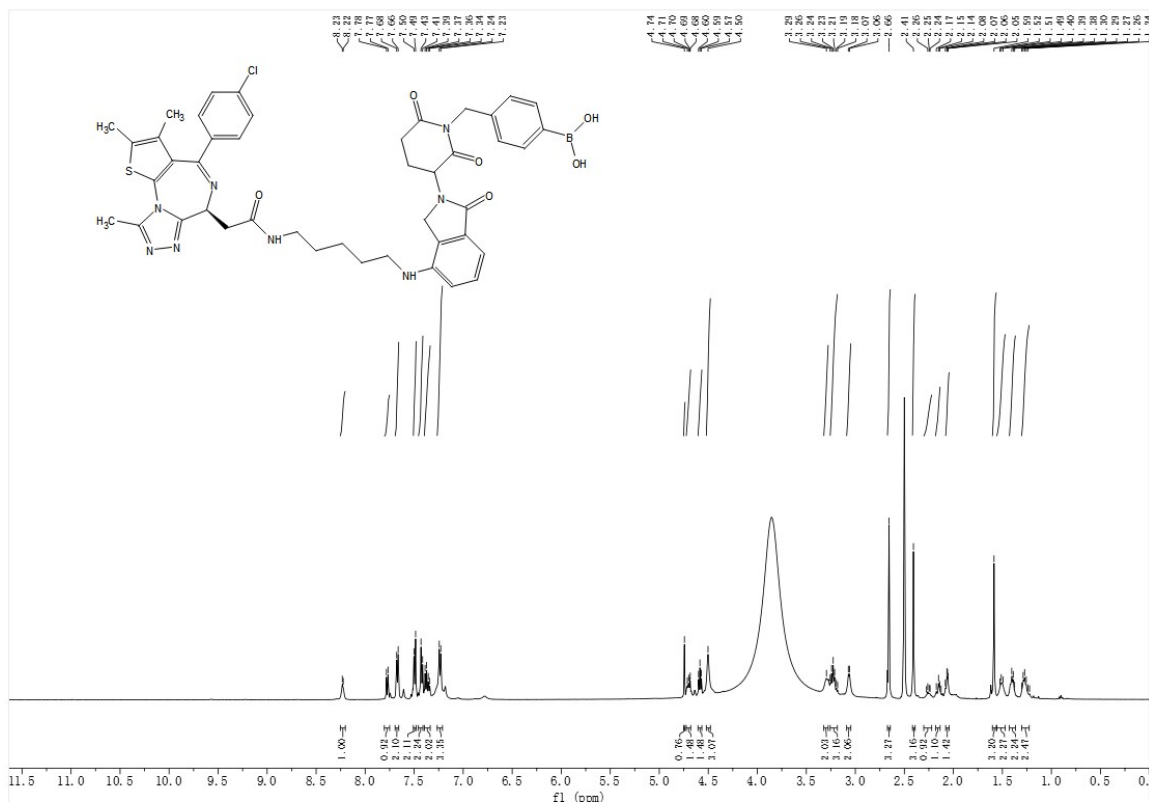

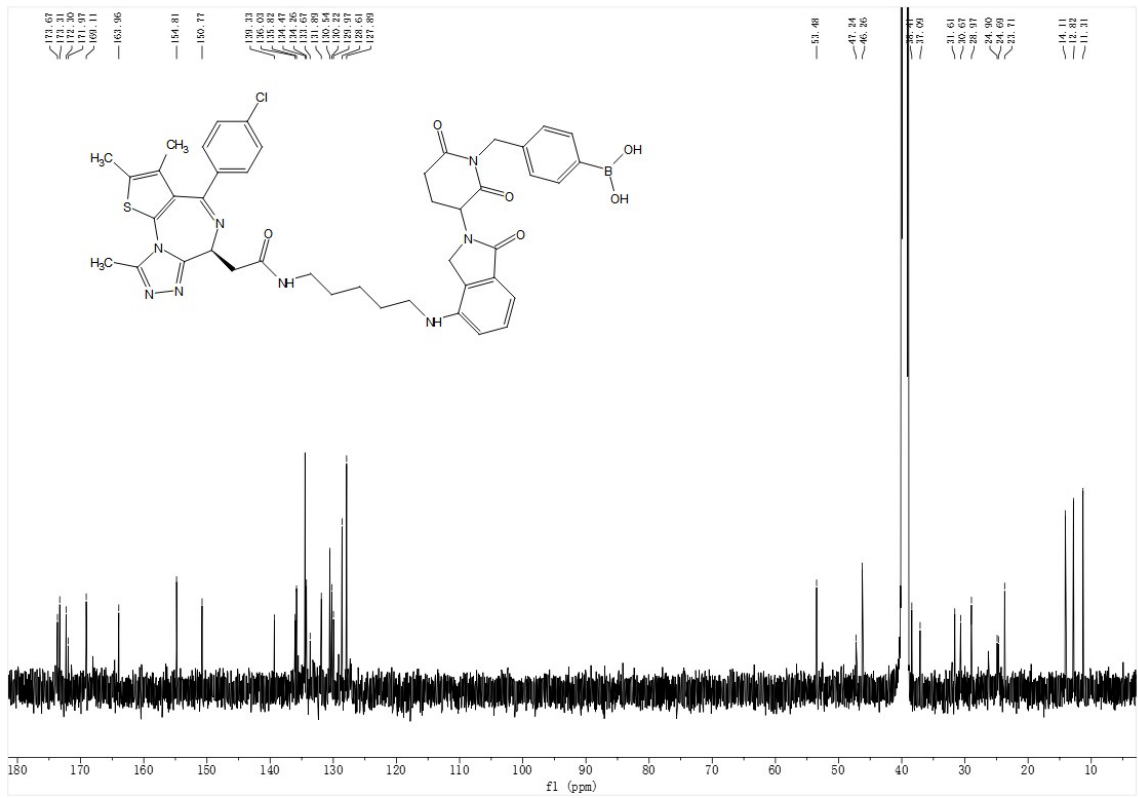



# Raw western blotting data

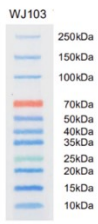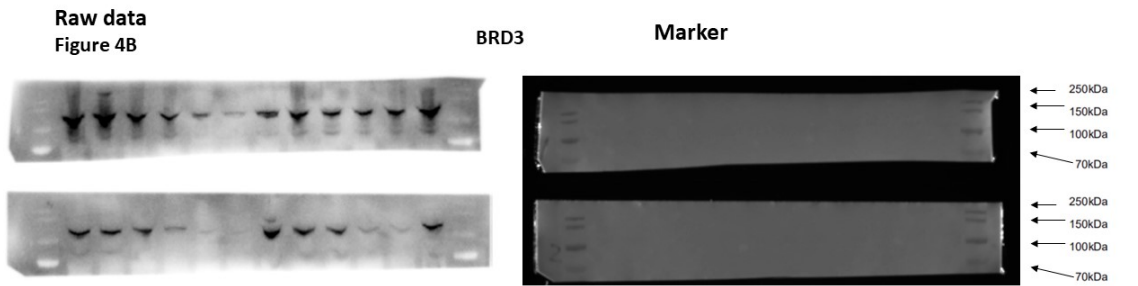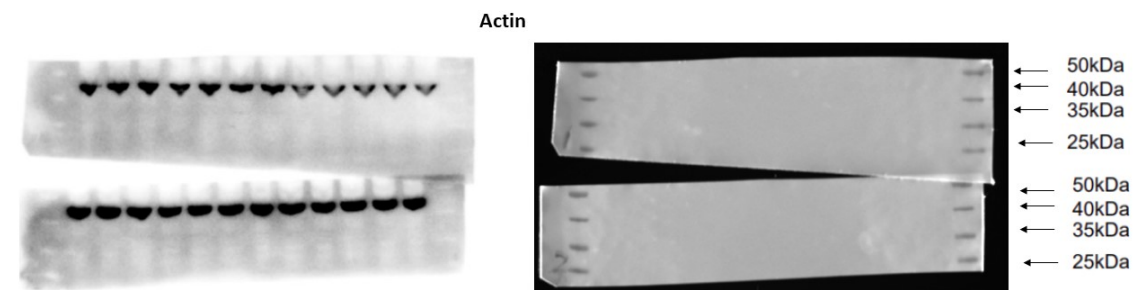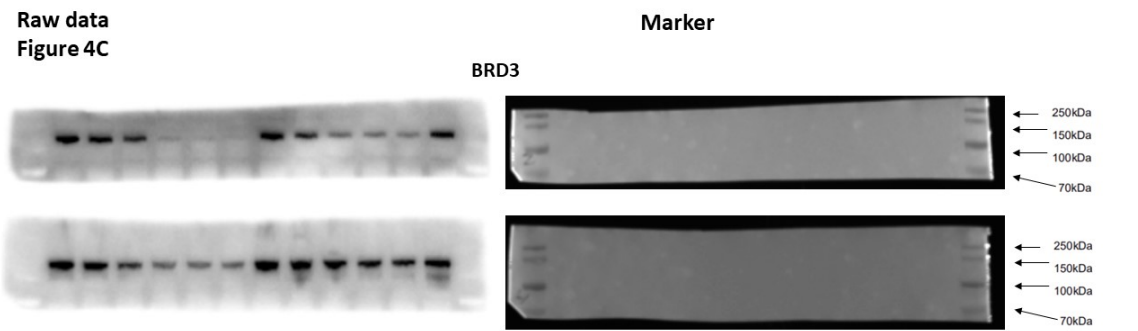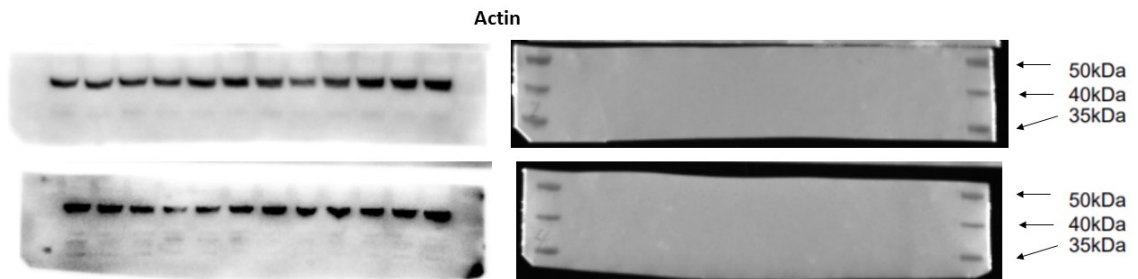

Raw data  
Figure 5

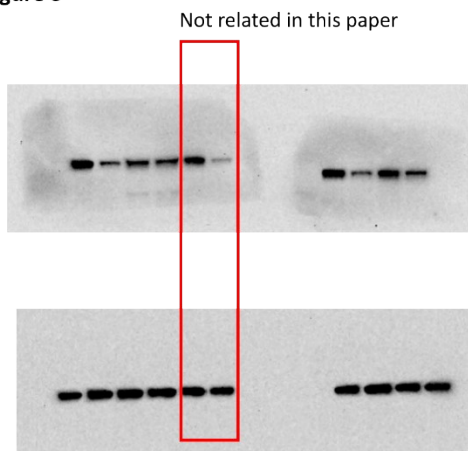

Marker

BRD3

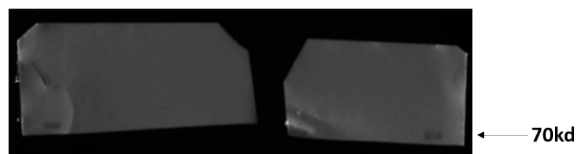

Actin

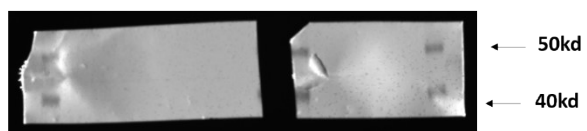

Raw data  
Figure s1A

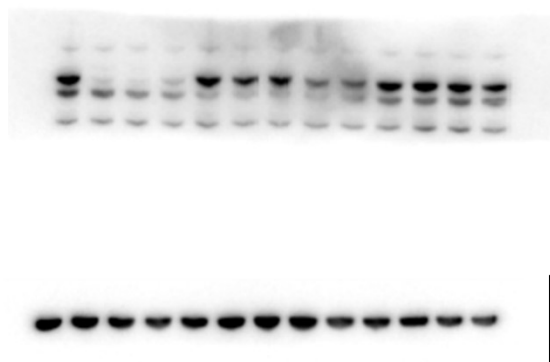

Marker

BRD4

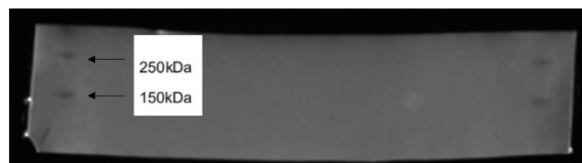

Actin

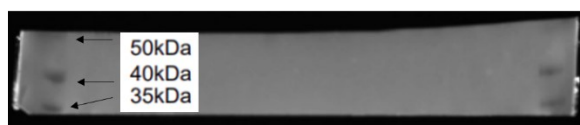

Raw data  
Figure s1B

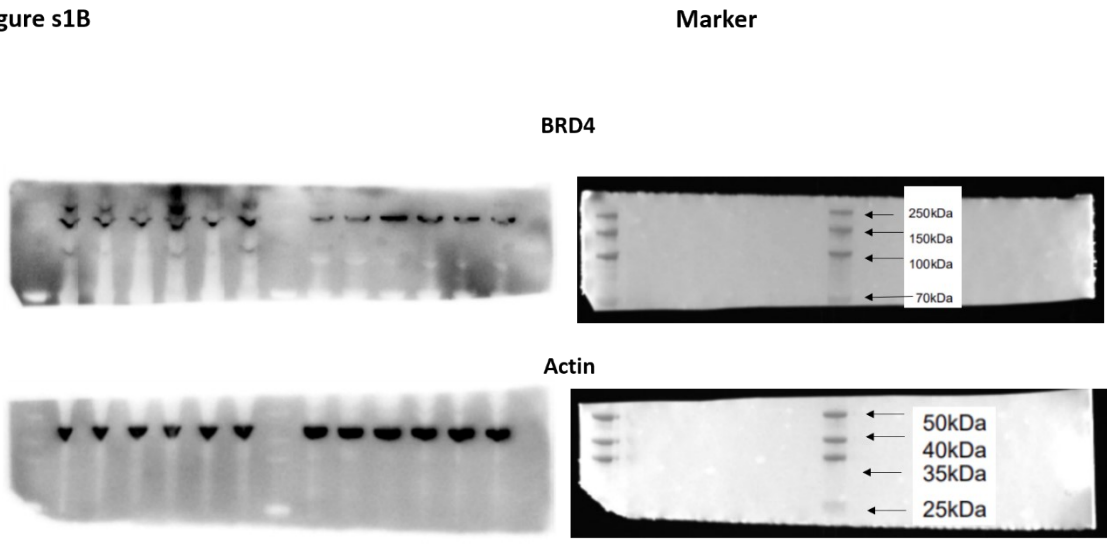

Raw data  
Figure s1C

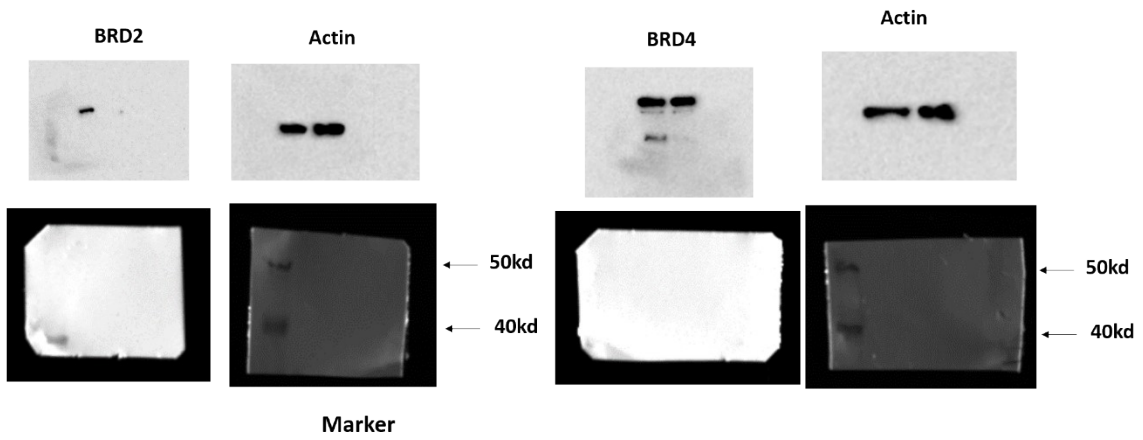

Supplement: d2cc03367d1.pdf [file d2cc03367d1.pdf]
